# Supplementary material for: Boosting the catalytic performance of metalloporphyrin-based covalent organic frameworks via coordination engineering for CO2 and O2 reduction
Source: Royal Society of Chemistry journal article supplement (doi:10.1039/d3qm01315d), 2024-01-01
Supplement: d3qm01315d1.pdf [file d3qm01315d1.pdf]

## Supporting Information for

### **Boosting the Catalytic Performance of Metalloporphyrin-Based Covalent Organic Frameworks via Coordination Engineering for CO<sub>2</sub> and O<sub>2</sub> Reduction**

*Zhixin Ren, Ke Gong, Bo Zhao, Shi-Lu Chen, Jing Xie\**

Key Laboratory of Cluster Science of Ministry of Education, Beijing Key Laboratory of Photoelectronic / Electrophotonic Conversion Materials, School of Chemistry and Chemical Engineering, Beijing Institute of Technology, Beijing, 100081, China.

E-mail: [jingxie@bit.edu.cn](mailto:jingxie@bit.edu.cn)

## Contents

|                                                                                                                                                                                                                      |         |
|----------------------------------------------------------------------------------------------------------------------------------------------------------------------------------------------------------------------|---------|
| Contents                                                                                                                                                                                                             | S2      |
| Supplementary Note 1. Additional details for Machine Learning                                                                                                                                                        | S3      |
| Figure S1      Optimized structures of Fe/Co/Ni-N <sub>x</sub> O <sub>y</sub> S <sub>z</sub> -Por-COFs                                                                                                               | S4      |
| Figure S2      Total energy and temperature evolutions <i>vs.</i> the time of AIMD simulation                                                                                                                        | S5      |
| Figure S3      Density of states of the Fe/Co/Ni-N <sub>x</sub> O <sub>y</sub> S <sub>z</sub> -Por-COFs                                                                                                              | S6      |
| Figure S4      Stable configurations for *CO <sub>2</sub> adsorbed on Fe/Co/Ni-N <sub>x</sub> O <sub>y</sub> S <sub>z</sub> -Por-COFs                                                                                | S7      |
| Figure S5      Percentage change in the angle ( $\angle$ OCO) of absorbed *CO <sub>2</sub>                                                                                                                           | S8      |
| Figure S6      Free-energy diagram for CO <sub>2</sub> RR-to-CO on Fe/Co/Ni-N <sub>x</sub> O <sub>y</sub> S <sub>z</sub> -Por-COFs                                                                                   | S9      |
| Figure S7-S8    Optimized configurations of the *COOH and *CO intermediates                                                                                                                                          | S10-S11 |
| Figure S9      Free-energy diagram for HER on Fe/Co/Ni-N <sub>x</sub> O <sub>y</sub> S <sub>z</sub> -Por-COFs                                                                                                        | S12     |
| Figure S10     Optimized configurations of the *H intermediates                                                                                                                                                      | S13     |
| Figure S11     Spin population of *COOH@Co-N <sub>2</sub> O <sub>2</sub> -Por-COF intermediate                                                                                                                       | S14     |
| Figure S12     CO <sub>2</sub> RR catalytic activity comparison between the designed Por-COFs and<br>the experimentally synthesized Co-Por-COFs                                                                      | S15     |
| Figure S13-S15    Adsorption configurations of *O <sub>2</sub> on Fe/Co/Ni-N <sub>x</sub> O <sub>y</sub> S <sub>z</sub> -Por-COFs                                                                                    | S16-S18 |
| Figure S16     Percentage change in the bond length ( $d_{O-O}$ ) of absorbed *O <sub>2</sub>                                                                                                                        | S19     |
| Figure S17     Free energy diagram for 4e <sup>-</sup> ORR on Fe/Co/Ni-N <sub>x</sub> O <sub>y</sub> S <sub>z</sub> -Por-COFs                                                                                        | S20     |
| Figure S18     Free energy diagrams that computed at pH = 7                                                                                                                                                          | S21     |
| Figure S19-S21    Optimized configurations of the *OOH, *O and *OH intermediates                                                                                                                                     | S22-S24 |
| Figure S22     Projected electronic densities of states and charge density difference                                                                                                                                | S25     |
| Figure S23     Free-energy diagrams for Cu-N <sub>3</sub> S-Por-COF and Pt-N <sub>2</sub> S <sub>2</sub> -Por-COF                                                                                                    | S26     |
| Table S1        The values of U-J parameters for DFT/PBE+U calculations                                                                                                                                              | S27     |
| Table S2-S4     Relative free energies (eV) with different magnetic moments $M$ ( $\mu_B$ ) for the<br>intermediates adsorbed on Fe-, Co and Ni-Por-COFs at 298.15 K                                                 | S28-S30 |
| Table S5-S6     Calculated zero-point energy (ZPE, eV) and entropic correction (TS, eV) of<br>*OOH, *O, *OH, *COOH, *CO and *H for Fe/Co/Ni-N <sub>x</sub> O <sub>y</sub> S <sub>z</sub> -Por-COFs at<br>T = 298.15K | S31-S32 |
| Table S7        Hyperparameters of three machine learning algorithms                                                                                                                                                 | S33     |
| Table S8-S9     Calculated adsorption energy, bond lengths and bond angle of *CO <sub>2</sub> and<br>*O <sub>2</sub> absorbed on Fe/Co/Ni-N <sub>x</sub> O <sub>y</sub> S <sub>z</sub> -Por-COFs                     | S34-S35 |
| Table S10       The feature values of Por-COFs                                                                                                                                                                       | S36-S37 |
| Table S11-S12    The comparison of the training/test RMSE and R <sup>2</sup> scores of three algorithms<br>at four different loops for $U_L^{CO2RR}$ and $\eta^{ORR}$                                                | S38-S39 |
| Table S13       Comparison of the ML-predicted and DFT-calculated $U_L^{CO2RR}$ and $\eta^{ORR}$                                                                                                                     | S40     |
| Table S14       Feature importance analysis of optimal GBR model for $U_L^{CO2RR}$ and $\eta^{ORR}$                                                                                                                  | S41     |
| Table S15       The ML-predicted or DFT-calculated $U_L^{CO2RR}$ and $\eta^{ORR}$ values for Cu-<br>/Pt/Co-embedded Por-COFs                                                                                         | S42     |
| References                                                                                                                                                                                                           | S43     |

## Supplementary Note 1. Additional details for Machine Learning

We tested the predictive ability of the trained ML models for Por-COFs with other central metals, Cu for CO<sub>2</sub>RR and Pt for ORR.<sup>1-4</sup> For each metal, the values of  $U_L^{\text{CO}_2\text{RR}}$  and  $\eta^{\text{ORR}}$  were predicted for six types of coordination environment, i.e. N<sub>4</sub>, N<sub>3</sub>O, N<sub>3</sub>S, N<sub>2</sub>O<sub>2</sub>, N<sub>2</sub>S<sub>2</sub>, N<sub>2</sub>OS (Table S15). Among them, Cu-N<sub>3</sub>S-Por-COF exhibits the optimal CO<sub>2</sub>RR activity ( $U_L^{\text{CO}_2\text{RR}} = -0.81$  V); and the Pt-N<sub>2</sub>S<sub>2</sub>-Por-COF exhibits the optimal ORR activity ( $\eta^{\text{ORR}} = 0.64$  V). It turns out these two ML-predicted values differ with the DFT calculated values by  $-0.67$  and  $0.97$  V (Figure S21). We further used the trained GBR-ML model to predict the  $U_L^{\text{CO}_2\text{RR}}$  value of Co-N<sub>3</sub>C<sub>1</sub> and Co-N<sub>2</sub>C<sub>2</sub>-Por-COF system.<sup>5</sup> Note that the coordinated carbon-atom was not in the training set. Inspiringly, it correctly predicted the catalytic order of Co-N<sub>2</sub>C<sub>2</sub> > Co-N<sub>3</sub>C<sub>1</sub>, albeit the match between ML-predicted and DFT calculated  $U_L^{\text{CO}_2\text{RR}}$  value is mediocre (error is 0.38 V). Above tests suggest that the trained model is immature to predict properties of systems that are out of the training set, which is usually the case. A direction to improve the accuracy of the model is to increase the sample size and type.

## Supplementary Figures

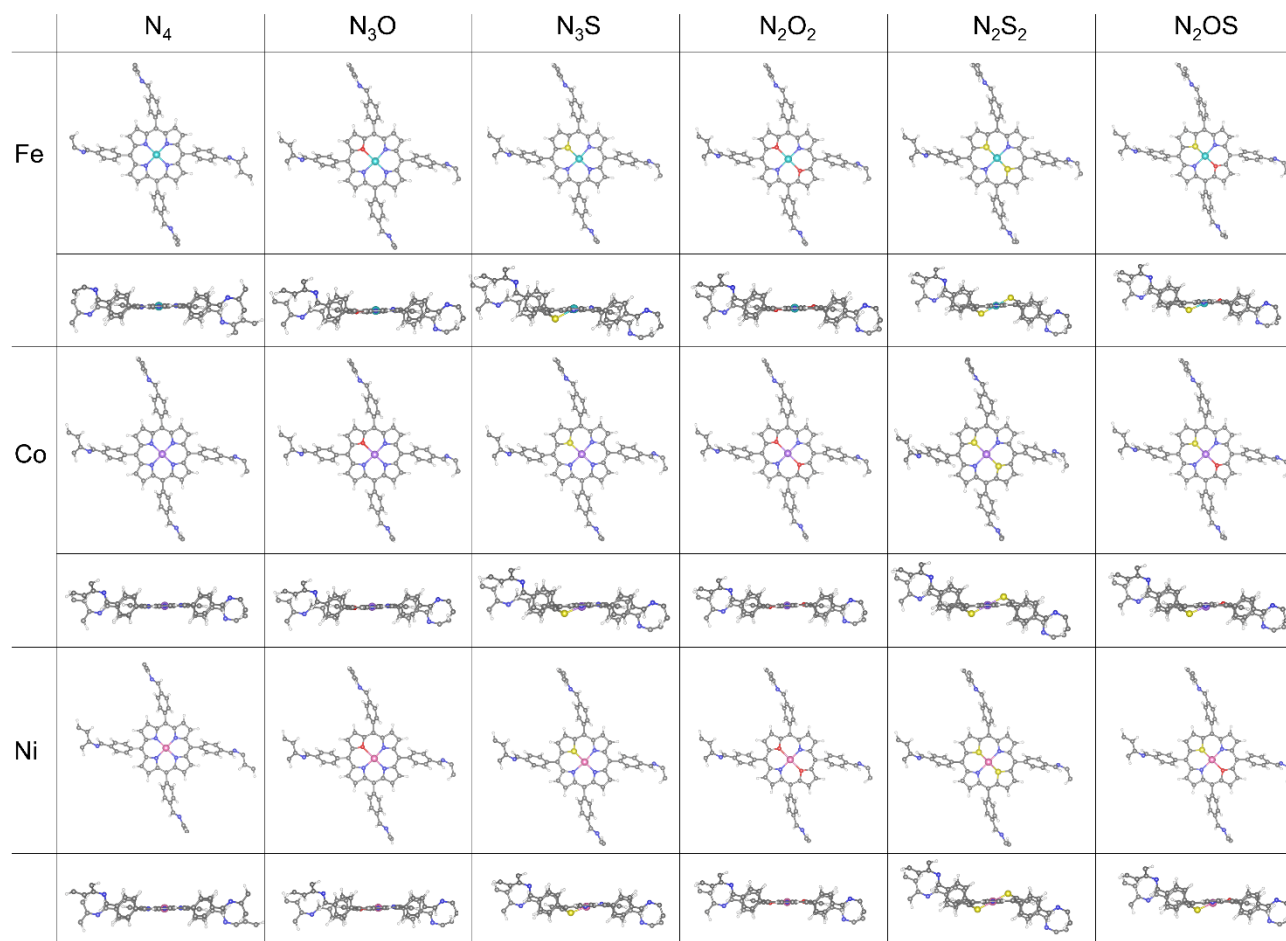

**Figure S1.** Optimized structures of Fe/Co/Ni- $N_xO_y$ -Por-COFs. Color code: C, grey; N, blue; O, red; S, yellow; H, white; Fe, cyan; Co, purple; Ni, pink.

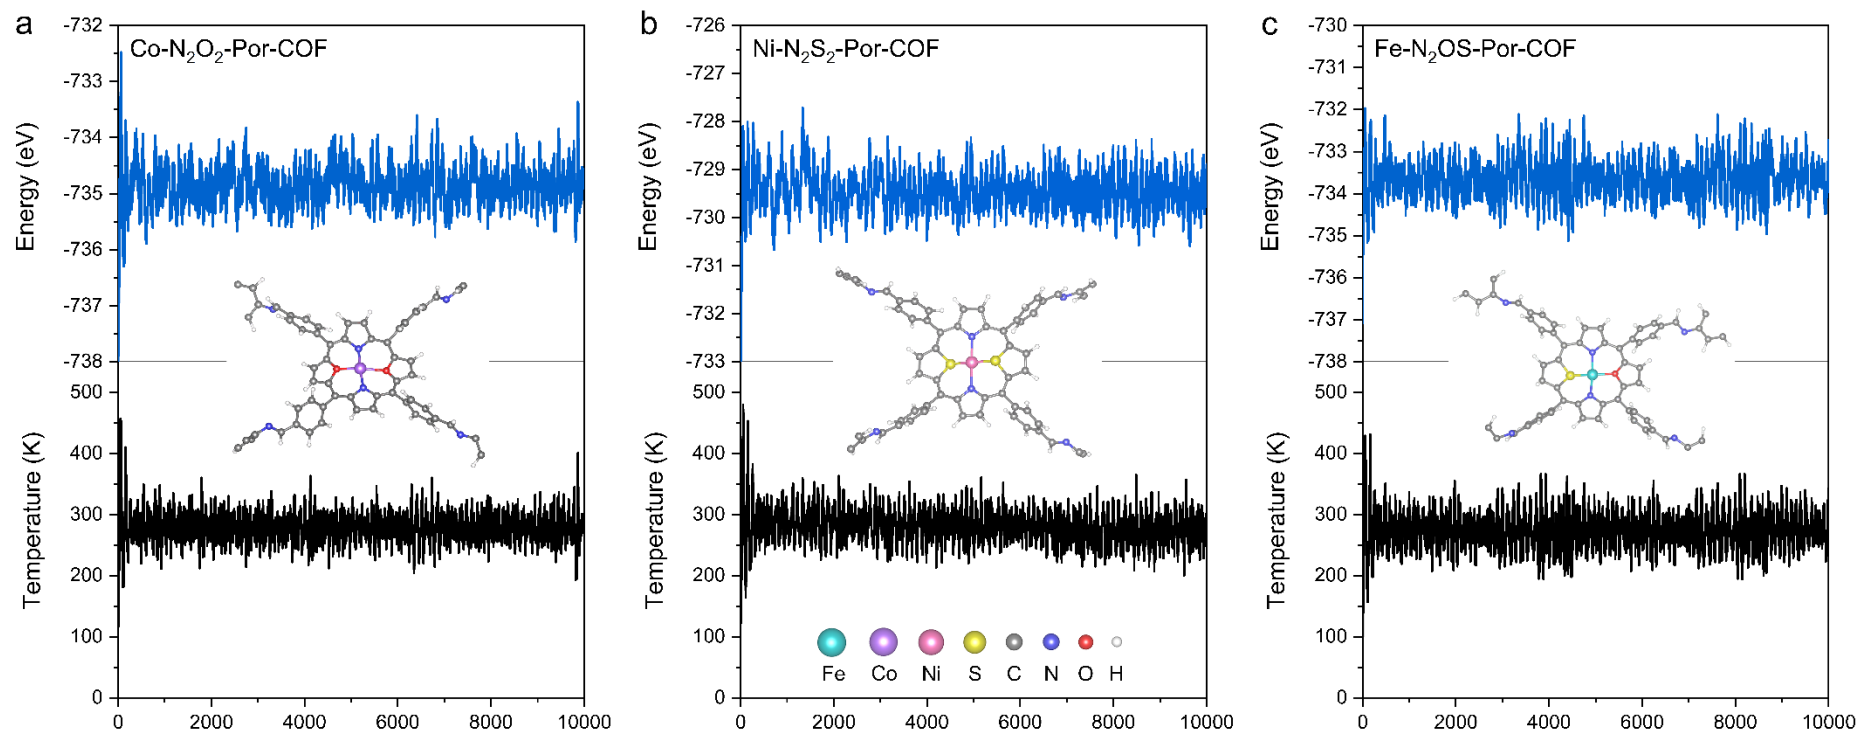

**Figure S2.** Total energy and temperature evolutions versus the time of AIMD simulation for a) Co-N<sub>2</sub>O<sub>2</sub>-, b) Ni-N<sub>2</sub>S<sub>2</sub>- and c) Fe-N<sub>2</sub>OS-Por-COFs. Snapshots of the equilibrium structures are inserted.

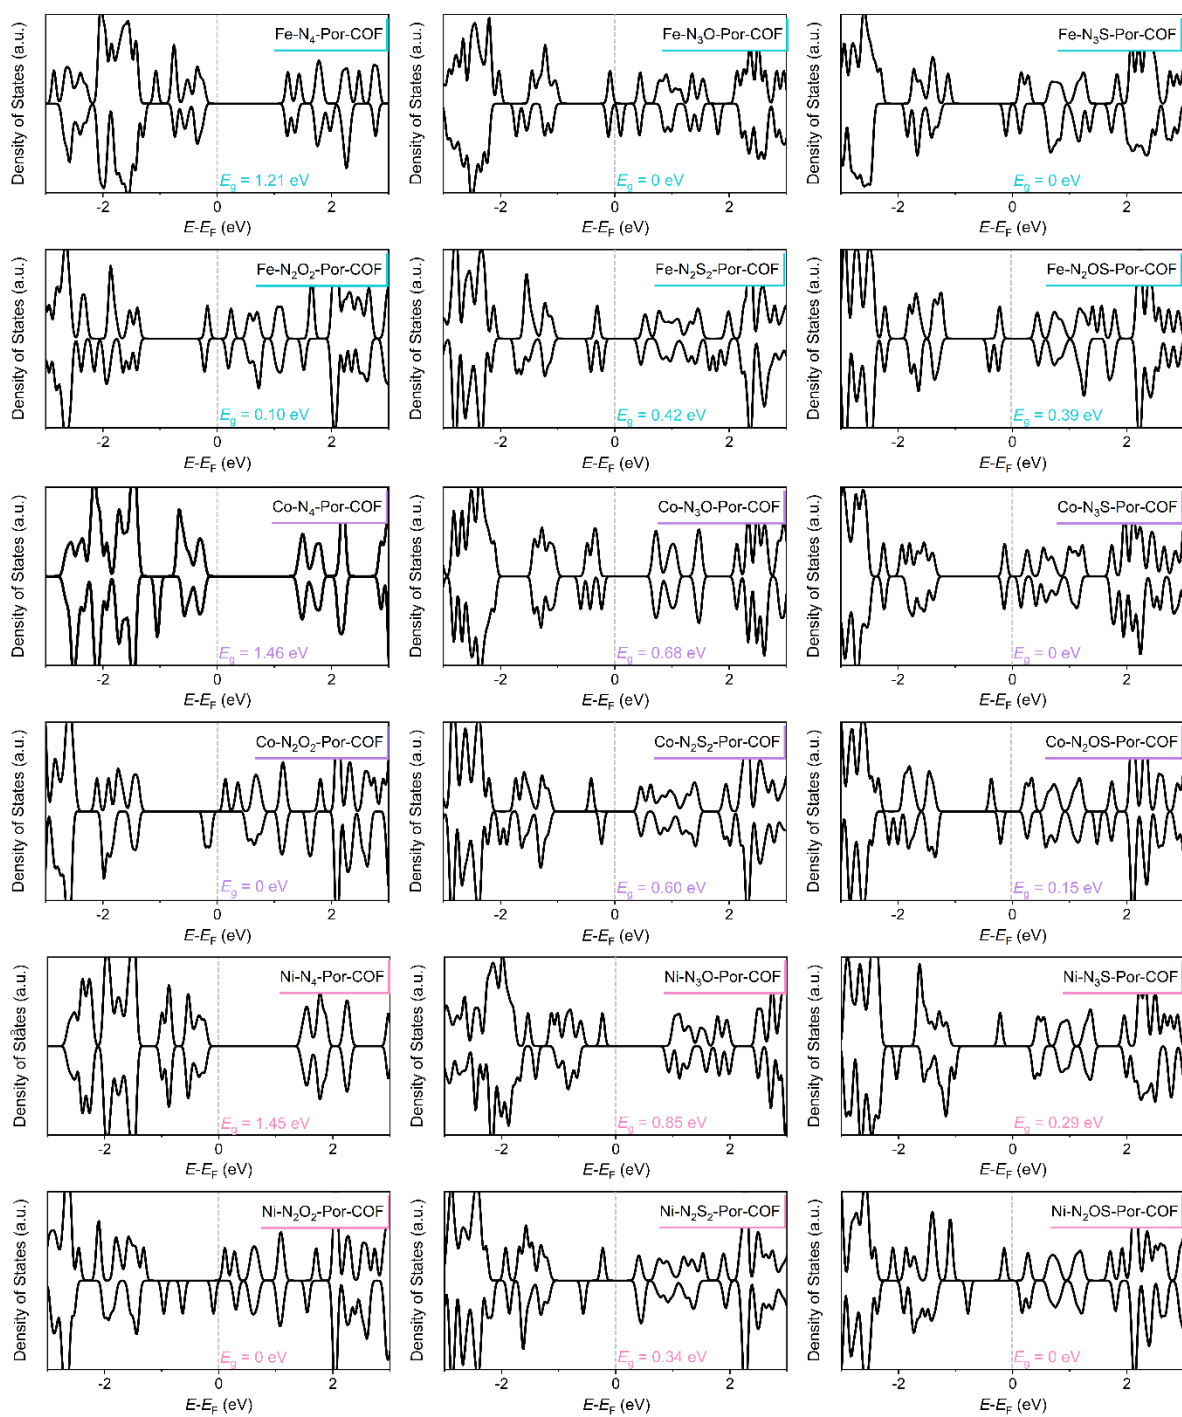

**Figure S3.** Density of states of the Fe/Co/Ni-N<sub>x</sub>O<sub>y</sub>S<sub>z</sub>-Por-COFs. The Fermi energy is referenced at 0 eV.

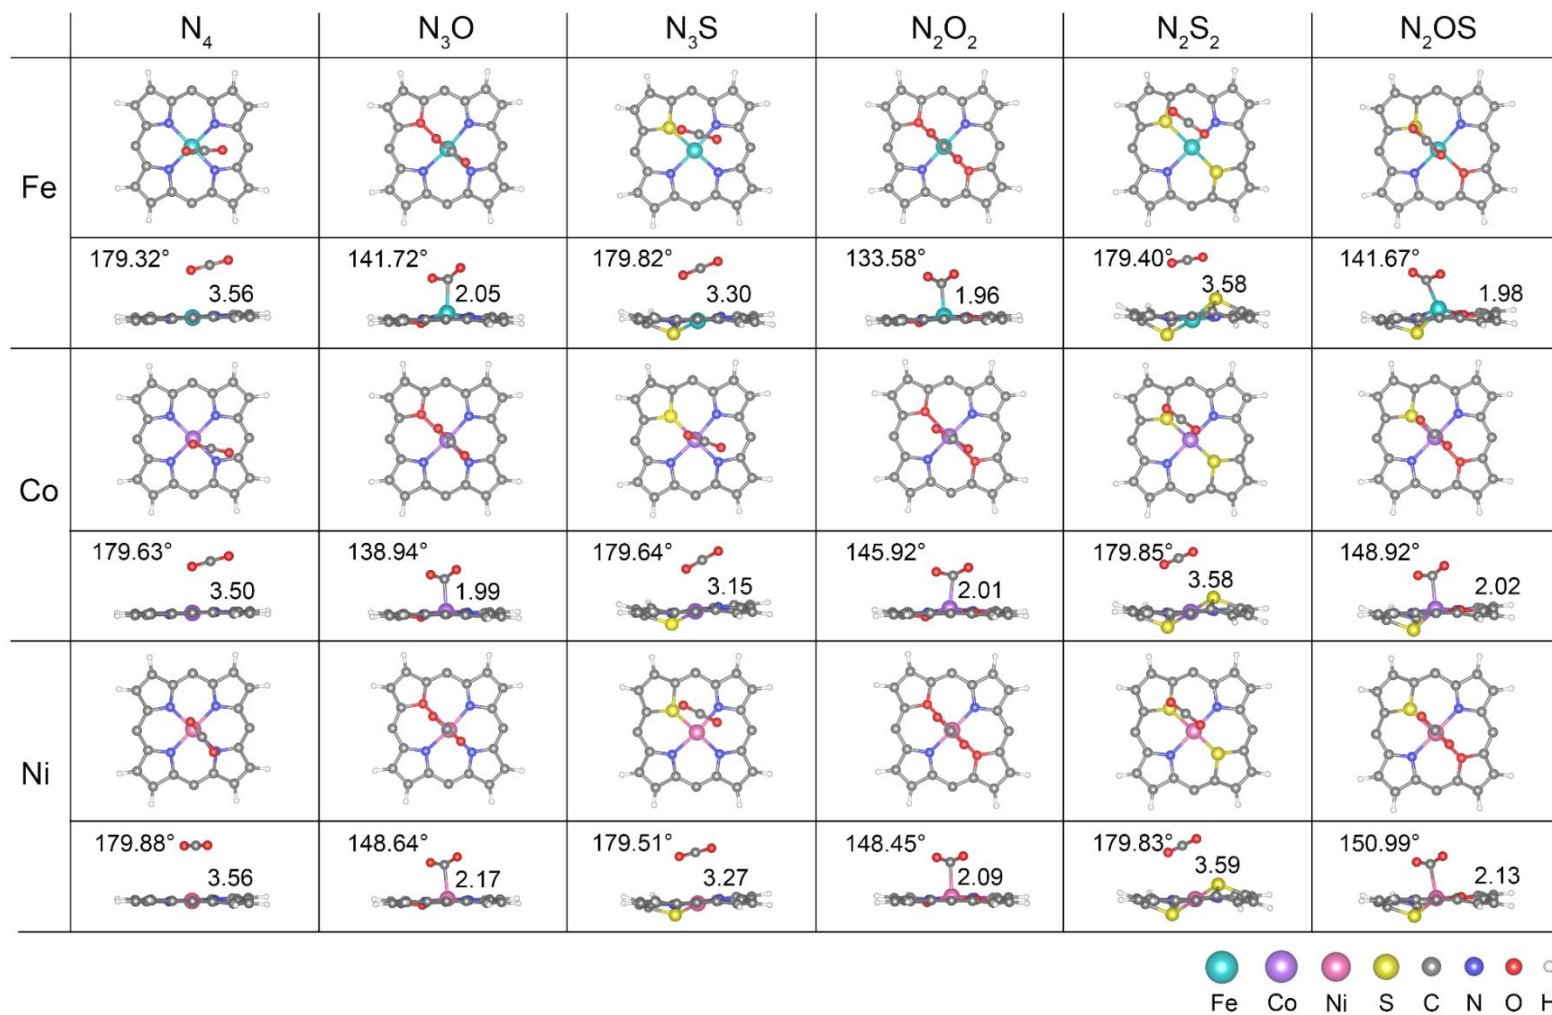

**Figure S4.** Stable configurations for \*CO<sub>2</sub> adsorbed on Fe/Co/Ni-N<sub>x</sub>O<sub>y</sub>S<sub>z</sub>-Por-COFs. For clarity, the tetraphenyl and the p-phenylenediamine (PPDA) moieties of M-N<sub>x</sub>O<sub>y</sub>S<sub>z</sub>-Por-COFs are not shown.

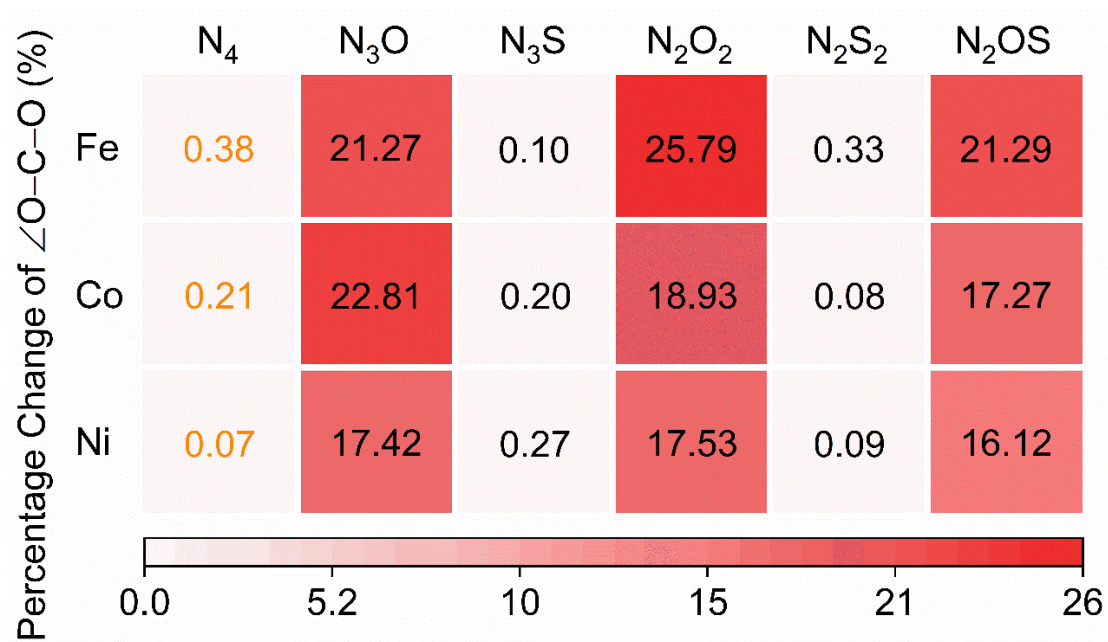

**Figure S5.** Percentage change in the angle ( $\angle OCO$ ) of absorbed  $^*CO_2$  compared to linear  $CO_2$  molecule in the gas phase. Refer to Table S8 for the values of the angle.



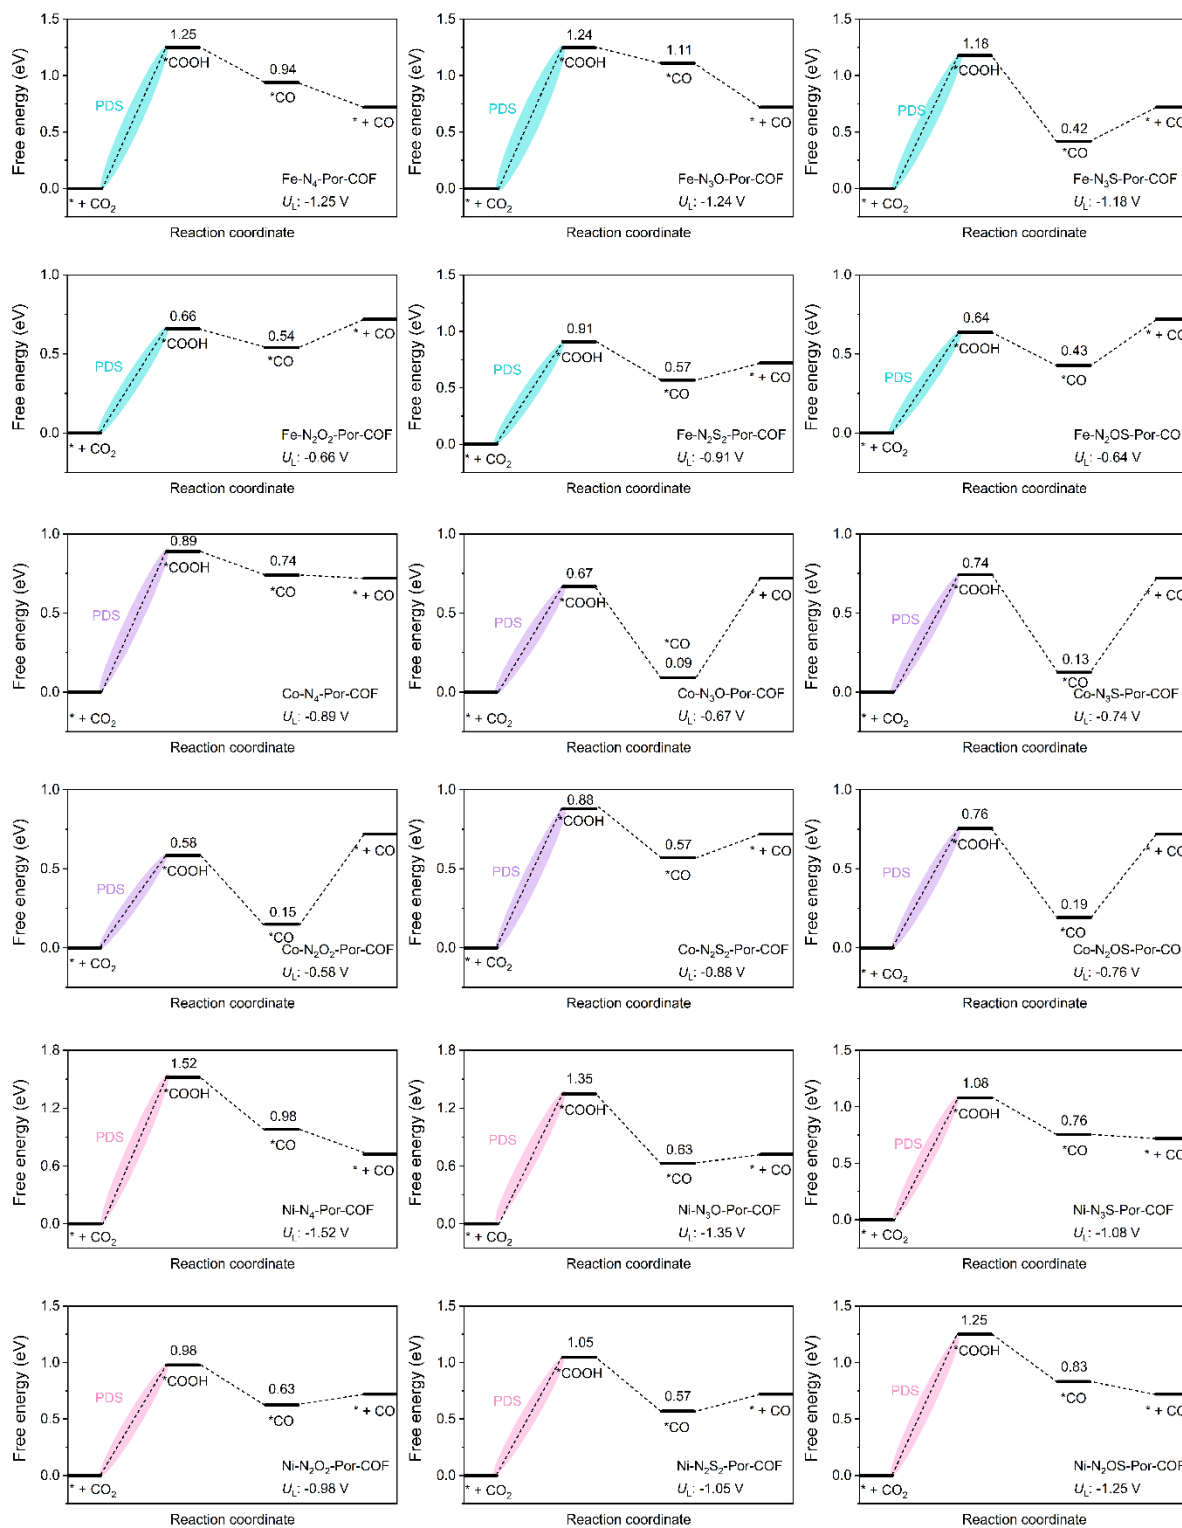

**Figure S6.** Free-energy diagram for CO<sub>2</sub>RR-to-CO on Fe/Co/Ni-N<sub>x</sub>O<sub>y</sub>S<sub>z</sub>-Por-COFs.

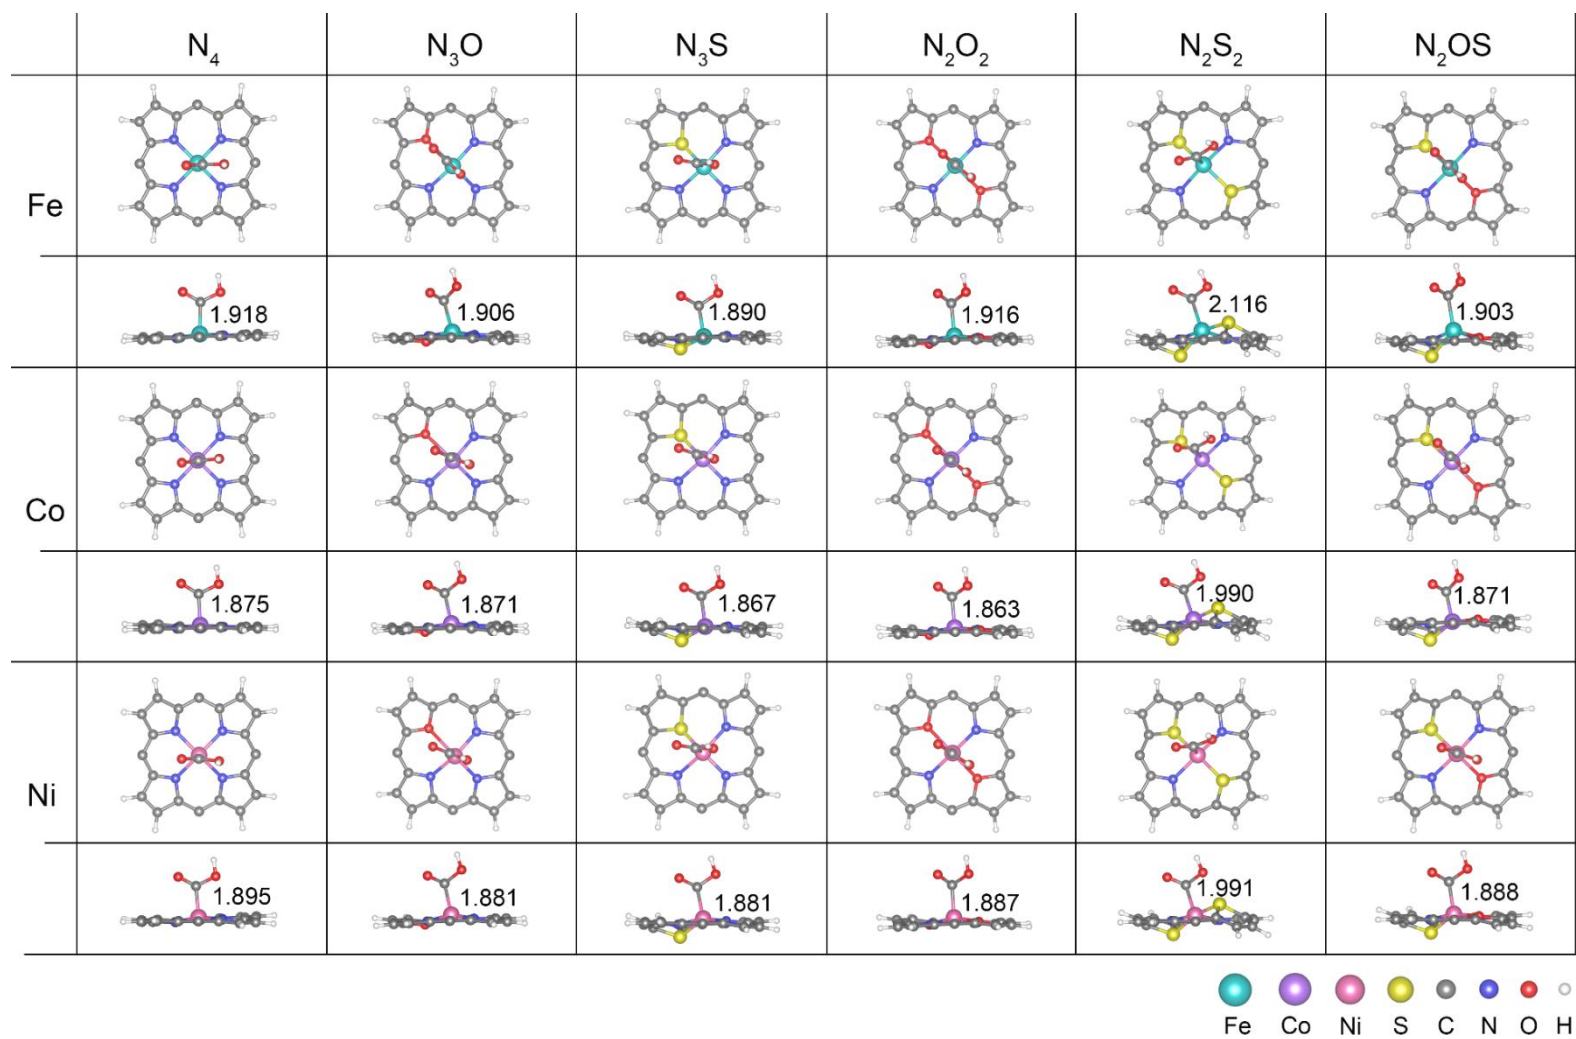

**Figure S7.** Optimized configurations of the \*COOH intermediate on Fe/Co/Ni- $N_xO_yS_z$ -Por-COFs. The M-C bond lengths (in Å) are present. For clarity, the tetraphenyl and the p-phenylenediamine (PPDA) moieties of M- $N_xO_yS_z$ -Por-COFs are not shown.

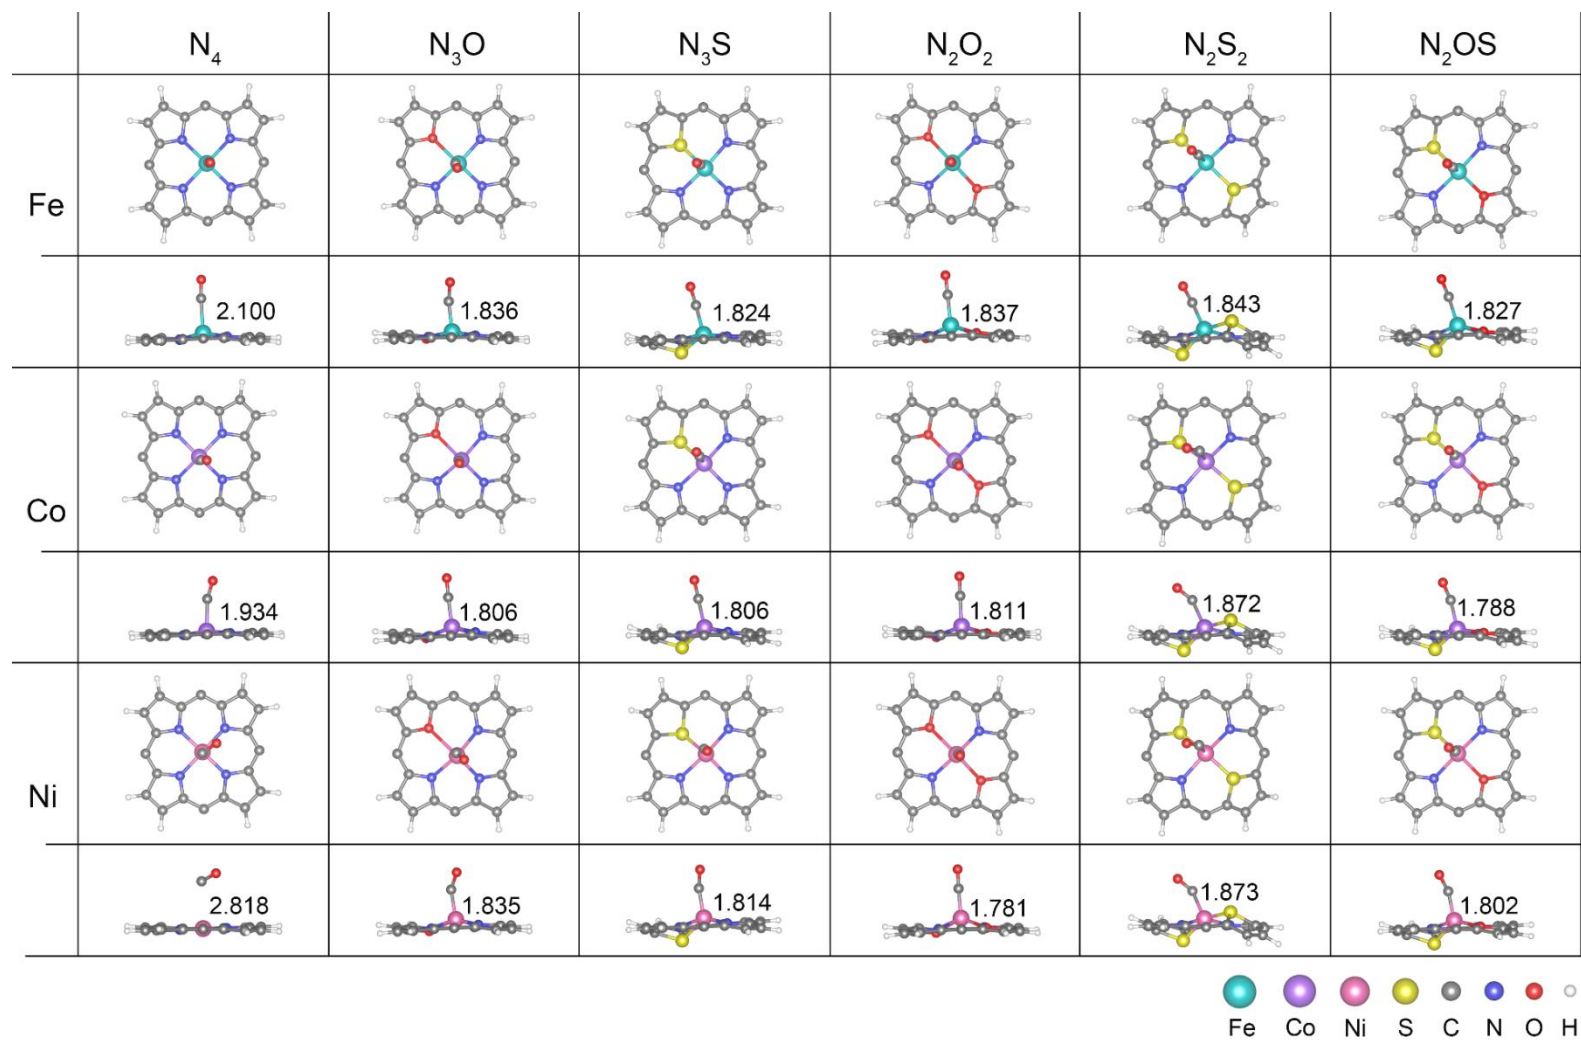

**Figure S8.** Optimized configurations of the \*CO intermediate on Fe/Co/Ni- $N_xO_yS_z$ -Por-COFs. The M-C bond lengths (in Å) are present. For clarity, the tetraphenyl and the p-phenylenediamine (PPDA) moieties of M- $N_xO_yS_z$ -Por-COFs are not shown.

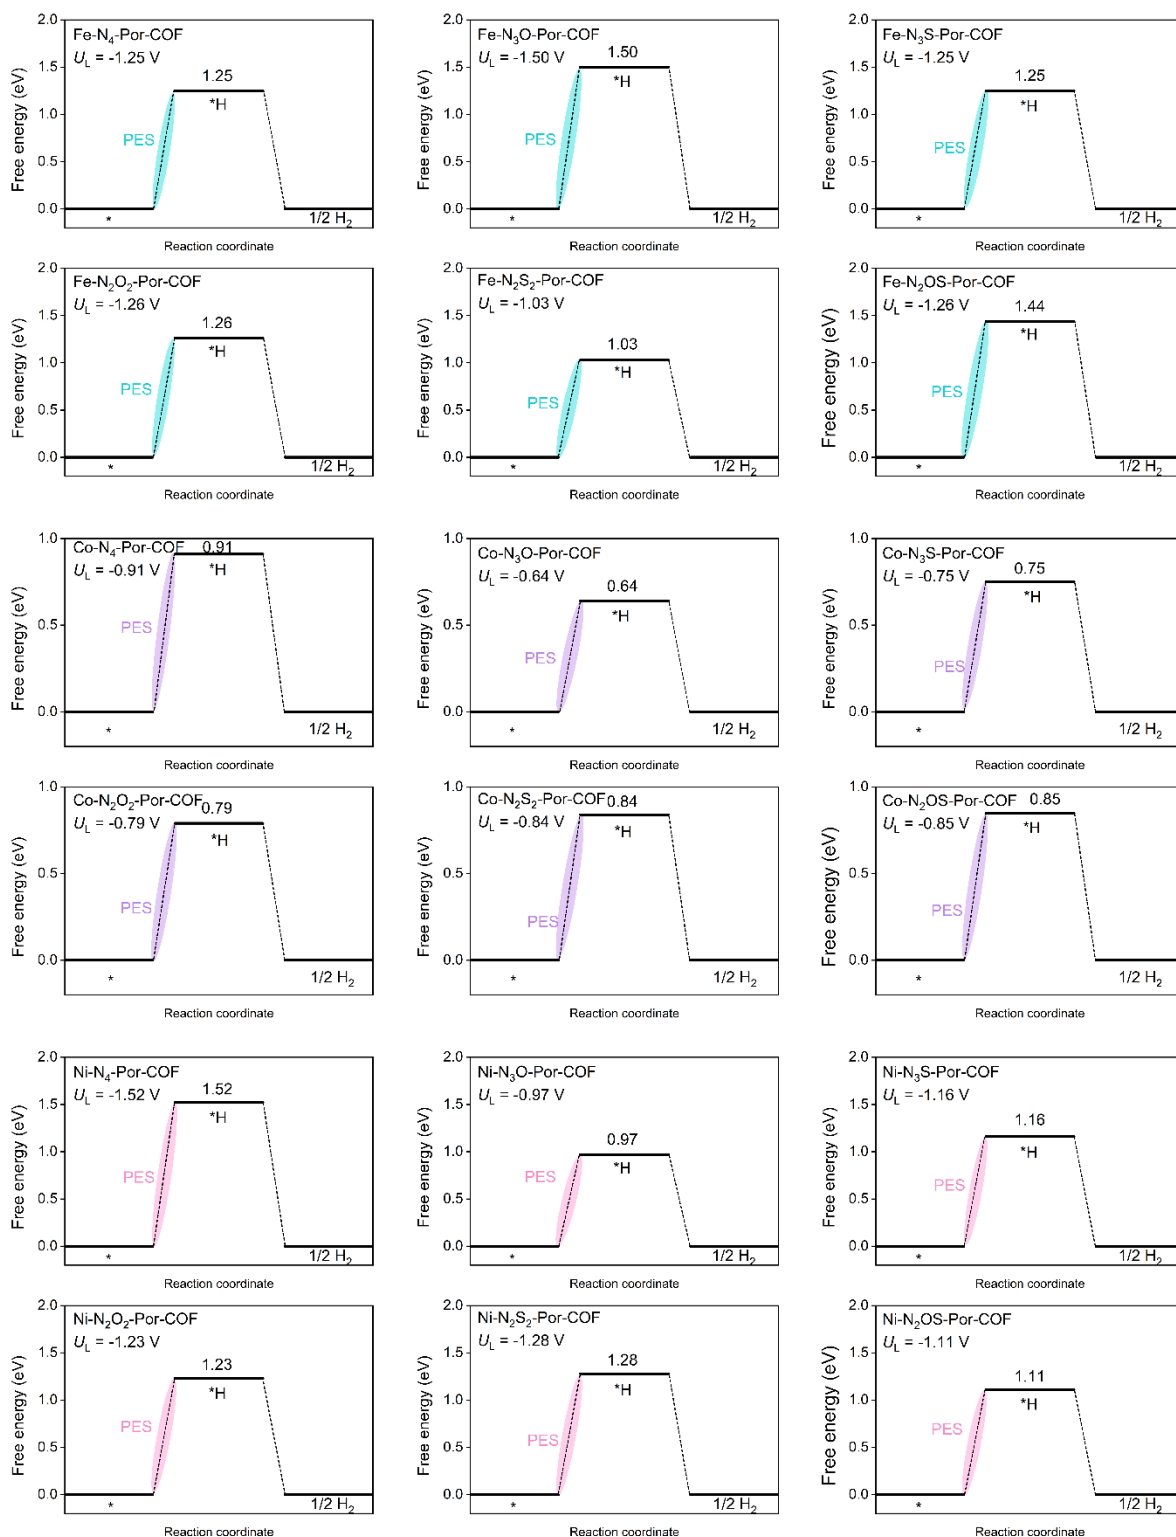

**Figure S9.** Free-energy diagram for HER on Fe/Co/Ni-N<sub>x</sub>O<sub>y</sub>S<sub>z</sub>-Por-COFs.

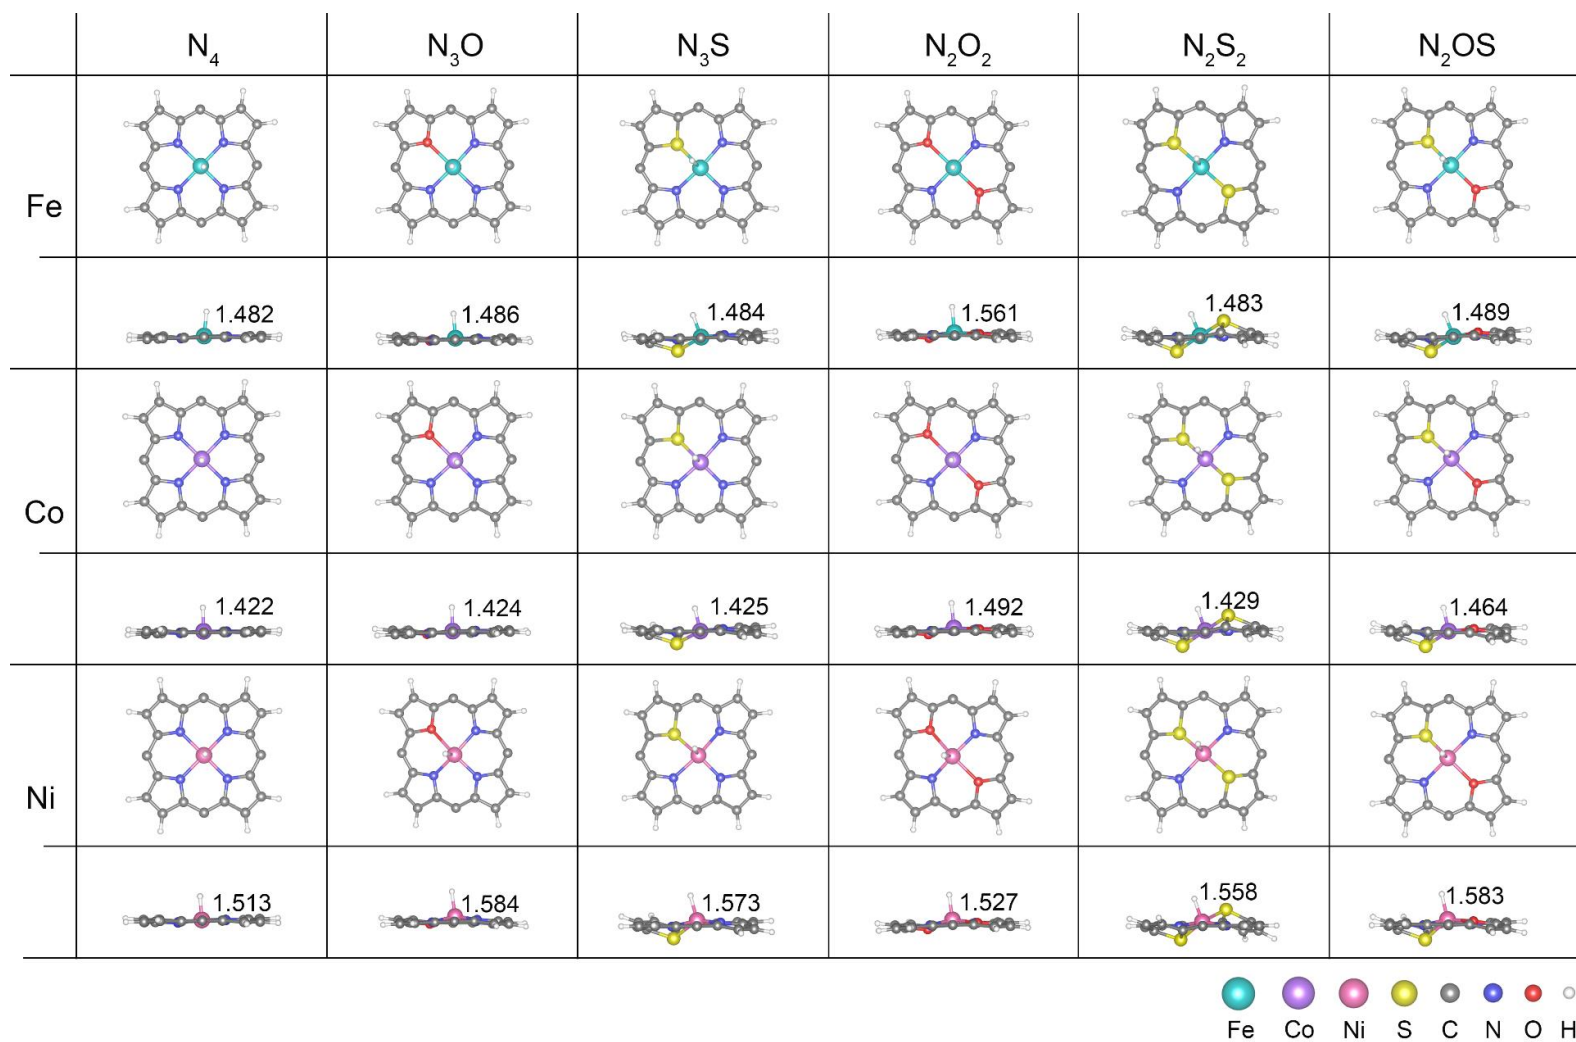

**Figure S10.** Optimized configurations of the \*H intermediate on Fe/Co/Ni- $N_xO_yS_z$ -Por-COFs. The M-H bond lengths (in Å) are present. For clarity, the tetraphenyl and the p-phenylenediamine (PPDA) moieties of M- $N_xO_yS_z$ -Por-COFs are not shown.

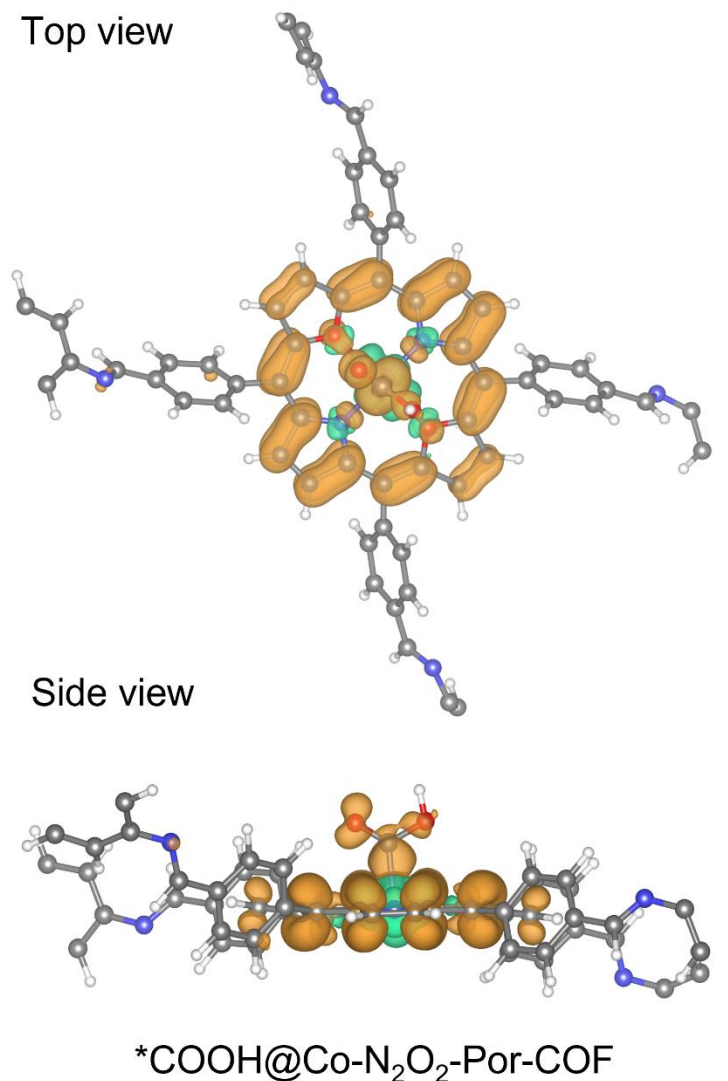

**Figure S11.** Spin population of COOH@Co-N<sub>2</sub>O<sub>2</sub>-Por-COF intermediate. Orange and green colors indicate  $\alpha$  or  $\beta$  spin electron density, respectively. Isosurfaces of charge density are set to  $0.001 e \text{ \AA}^{-3}$ . For clarity, the tetraphenyl and the p-phenylenediamine (PPDA) moieties of Co-N<sub>2</sub>O<sub>2</sub>-Por-COF are not shown.

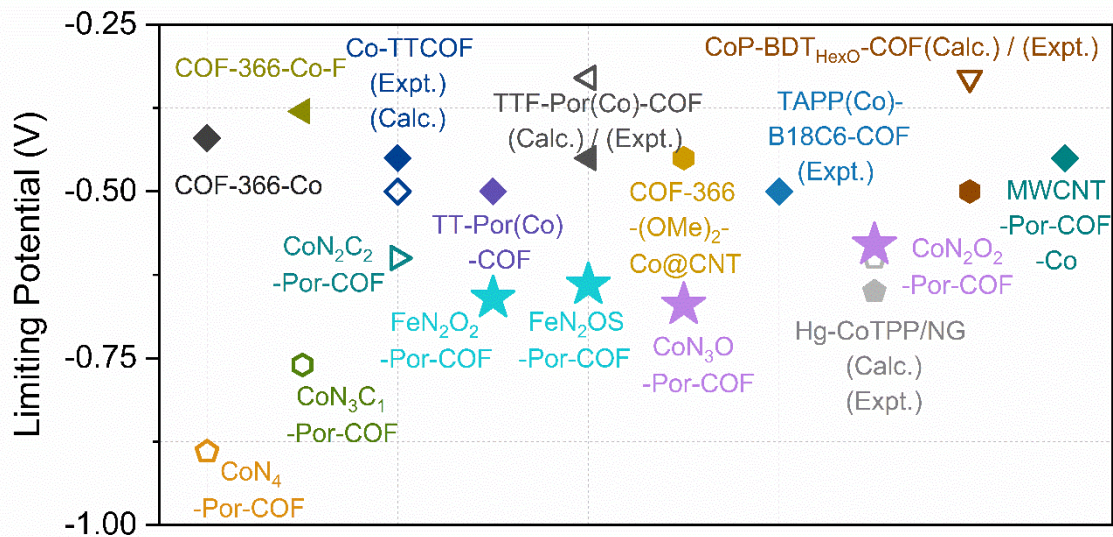

**Figure S12.** Electrocatalytic CO<sub>2</sub>RR performance comparison between the designed Co-N<sub>2</sub>O<sub>2</sub>-, Fe-N<sub>2</sub>OS-, Fe-N<sub>2</sub>O<sub>2</sub>- and Co-N<sub>3</sub>O-Por-COFs (this work) and experimentally synthesized Co-Por-COFs for CO<sub>2</sub>-to-CO reduction. The calculated limiting potentials  $U_L$  in this work (stars) are compared with experimental onset potentials  $U^{\text{onset}}$  (solid points) and/or calculated  $U_L$  (hollow points) in literatures.<sup>6-15</sup>

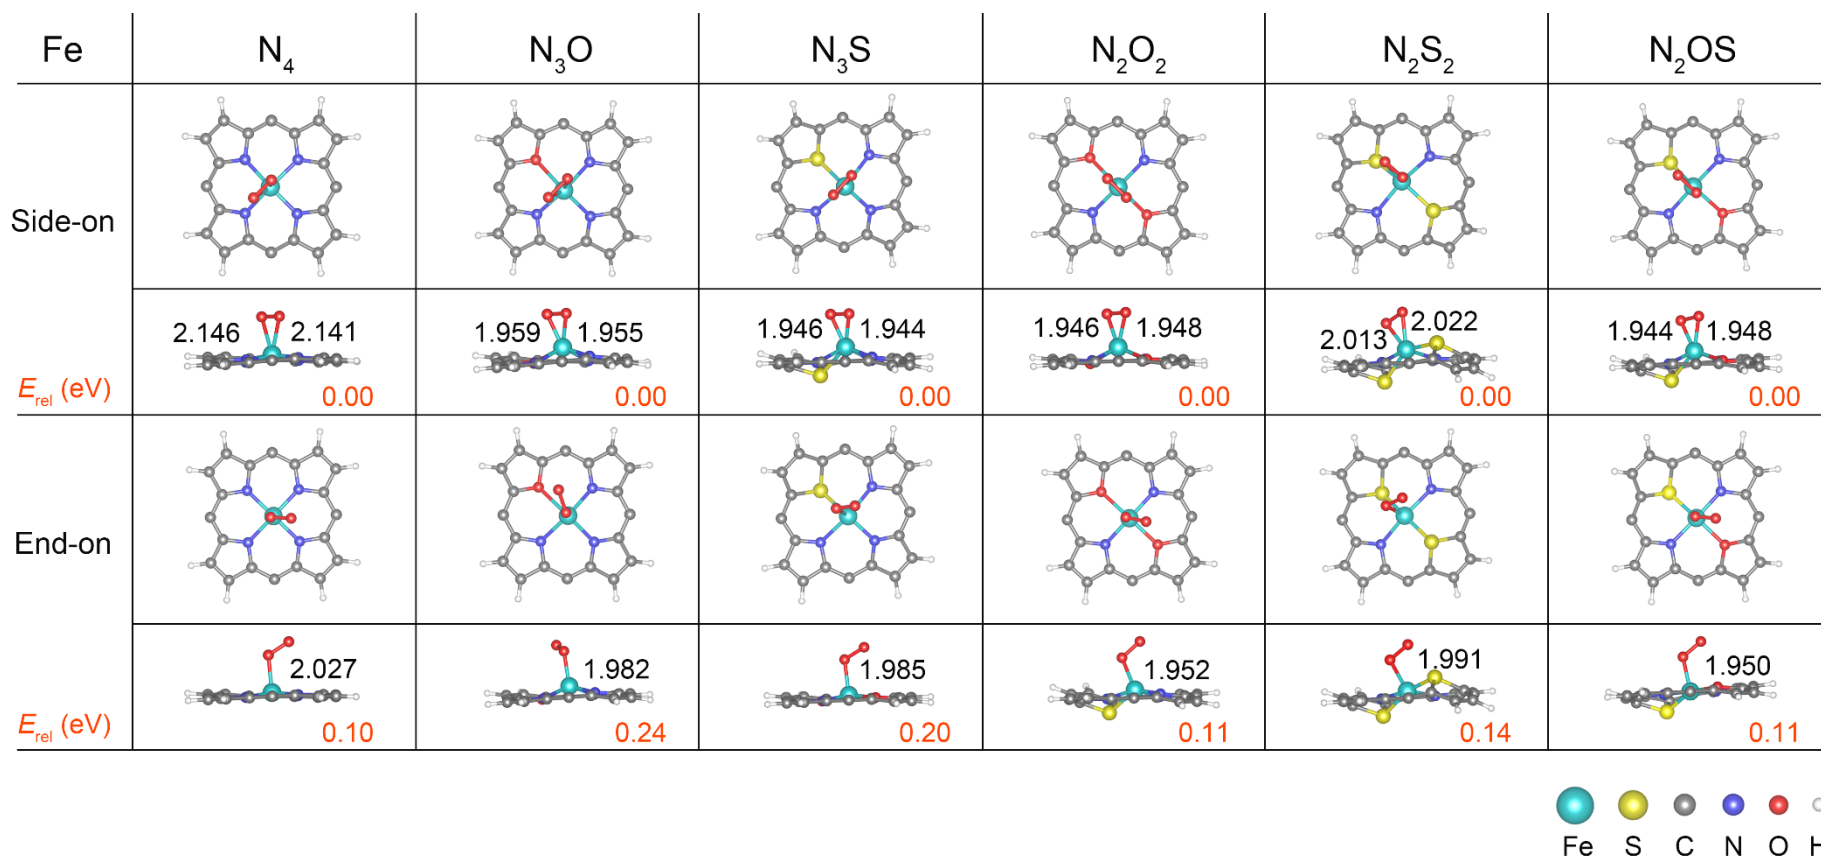

**Figure S13.** Side-on and end-on type adsorption configurations of \*O<sub>2</sub> on Fe-N<sub>x</sub>O<sub>y</sub>S<sub>z</sub>-Por-COFs. The Fe–O bond lengths (in Å) and relative energies ( $E_{rel}$ , in eV) are present. For clarity, the tetraphenyl and the p-phenylenediamine (PPDA) moieties of Fe-N<sub>x</sub>O<sub>y</sub>S<sub>z</sub>-Por-COFs are not shown.



| Co      | N <sub>4</sub>                                                                                     | N <sub>3</sub> O                                                                                         | N <sub>3</sub> S                                                                                          | N <sub>2</sub> O <sub>2</sub>                                                                              | N <sub>2</sub> S <sub>2</sub>                                                                                 | N <sub>2</sub> OS                                                                                          |
|---------|----------------------------------------------------------------------------------------------------|----------------------------------------------------------------------------------------------------------|-----------------------------------------------------------------------------------------------------------|------------------------------------------------------------------------------------------------------------|---------------------------------------------------------------------------------------------------------------|------------------------------------------------------------------------------------------------------------|
| Side-on | Not available                                                                                      | 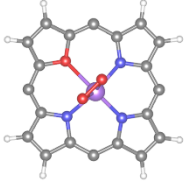                        |                         |                         |                            |                         |
|         |                                                                                                    | <br>1.957 1.955<br>0.02 | <br>1.944 1.944<br>0.01 | <br>1.946 1.948<br>0.02 | <br>2.017<br>2.015<br>0.06 | <br>2.024 2.018<br>0.00 |
| End-on  |                   |                         |                         |                         |                            |                         |
|         | <br>2.616<br>0.00 | <br>1.958<br>0.00       | <br>1.952<br>0.00       | <br>1.934<br>0.00       | <br>1.990<br>0.00          | <br>1.948<br>0.02       |



Co S C N O H

**Figure S14.** Side-on and end-on type adsorption configurations of \*O<sub>2</sub> on Co-N<sub>x</sub>O<sub>y</sub>S<sub>z</sub>-Por-COFs. The Co–O bond lengths (in Å) and relative energies ( $E_{\text{rel}}$ , in eV) are present. For clarity, the tetraphenyl and the p-phenylenediamine (PPDA) moieties of Co-N<sub>x</sub>O<sub>y</sub>S<sub>z</sub>-Por-COFs are not shown.

| Ni             | N <sub>4</sub>                                                                             | N <sub>3</sub> O                                                                                         | N <sub>3</sub> S                                                                                          | N <sub>2</sub> O <sub>2</sub>                                                                              | N <sub>2</sub> S <sub>2</sub>                                                                              | N <sub>2</sub> OS                                                                                          |
|----------------|--------------------------------------------------------------------------------------------|----------------------------------------------------------------------------------------------------------|-----------------------------------------------------------------------------------------------------------|------------------------------------------------------------------------------------------------------------|------------------------------------------------------------------------------------------------------------|------------------------------------------------------------------------------------------------------------|
| Side-on        | Not available                                                                              | 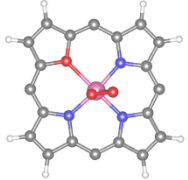                        |                         |                         |                         |                         |
| $E_{rel}$ (eV) |                                                                                            | <br>1.952 1.970<br>0.01 | <br>1.960 1.747<br>0.03 | <br>1.963 1.960<br>0.01 | <br>1.987 1.990<br>0.01 | <br>1.943 1.951<br>0.01 |
| End-on         |           |                         |                         |                         |                         |                         |
| $E_{rel}$ (eV) | <br>2.615 | <br>1.991<br>0.00       | <br>1.976<br>0.00       | <br>1.985<br>0.00       | <br>2.059<br>0.00       | <br>2.025<br>0.02       |



Ni S C N O H

**Figure S15.** Side-on and end-on type adsorption configurations of \*O<sub>2</sub> on Ni-N<sub>x</sub>O<sub>y</sub>S<sub>z</sub>-Por-COFs. The Co–O bond lengths (in Å) and relative energies ( $E_{rel}$ , in eV) are present. For clarity, the tetraphenyl and the p-phenylenediamine (PPDA) moieties of Ni-N<sub>x</sub>O<sub>y</sub>S<sub>z</sub>-Por-COFs are not shown.

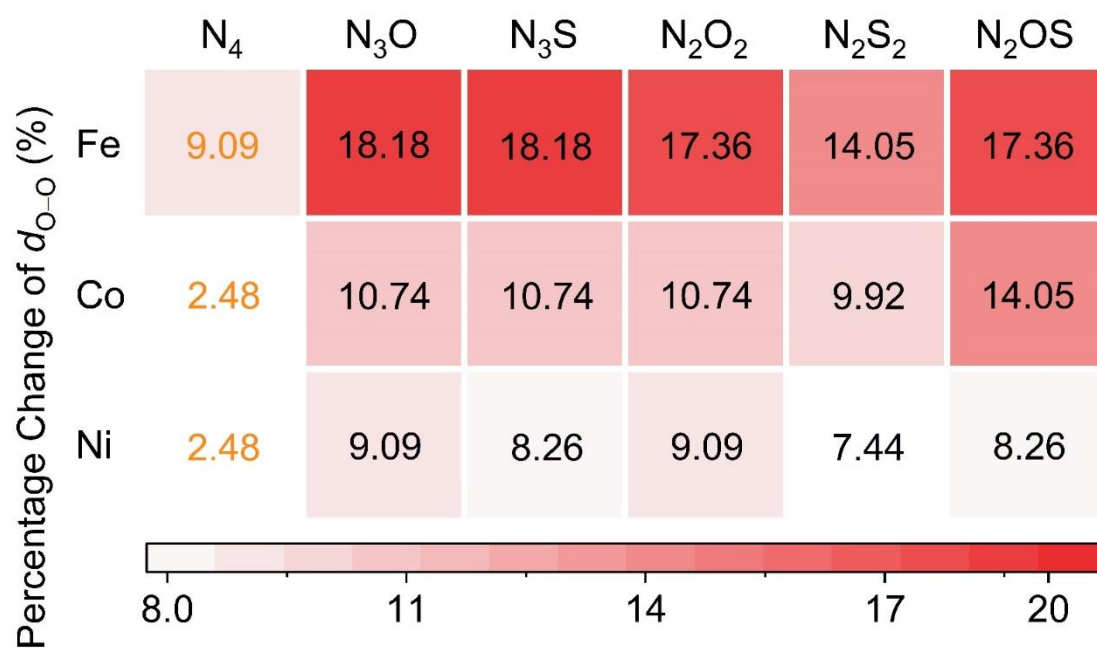

**Figure S16.** Percentage change in the bond length ( $d_{O-O}$ ) of absorbed  $*O_2$  compared to linear  $O_2$  molecule in the gas phase. Refer to Table S9 for the values of the bond length.

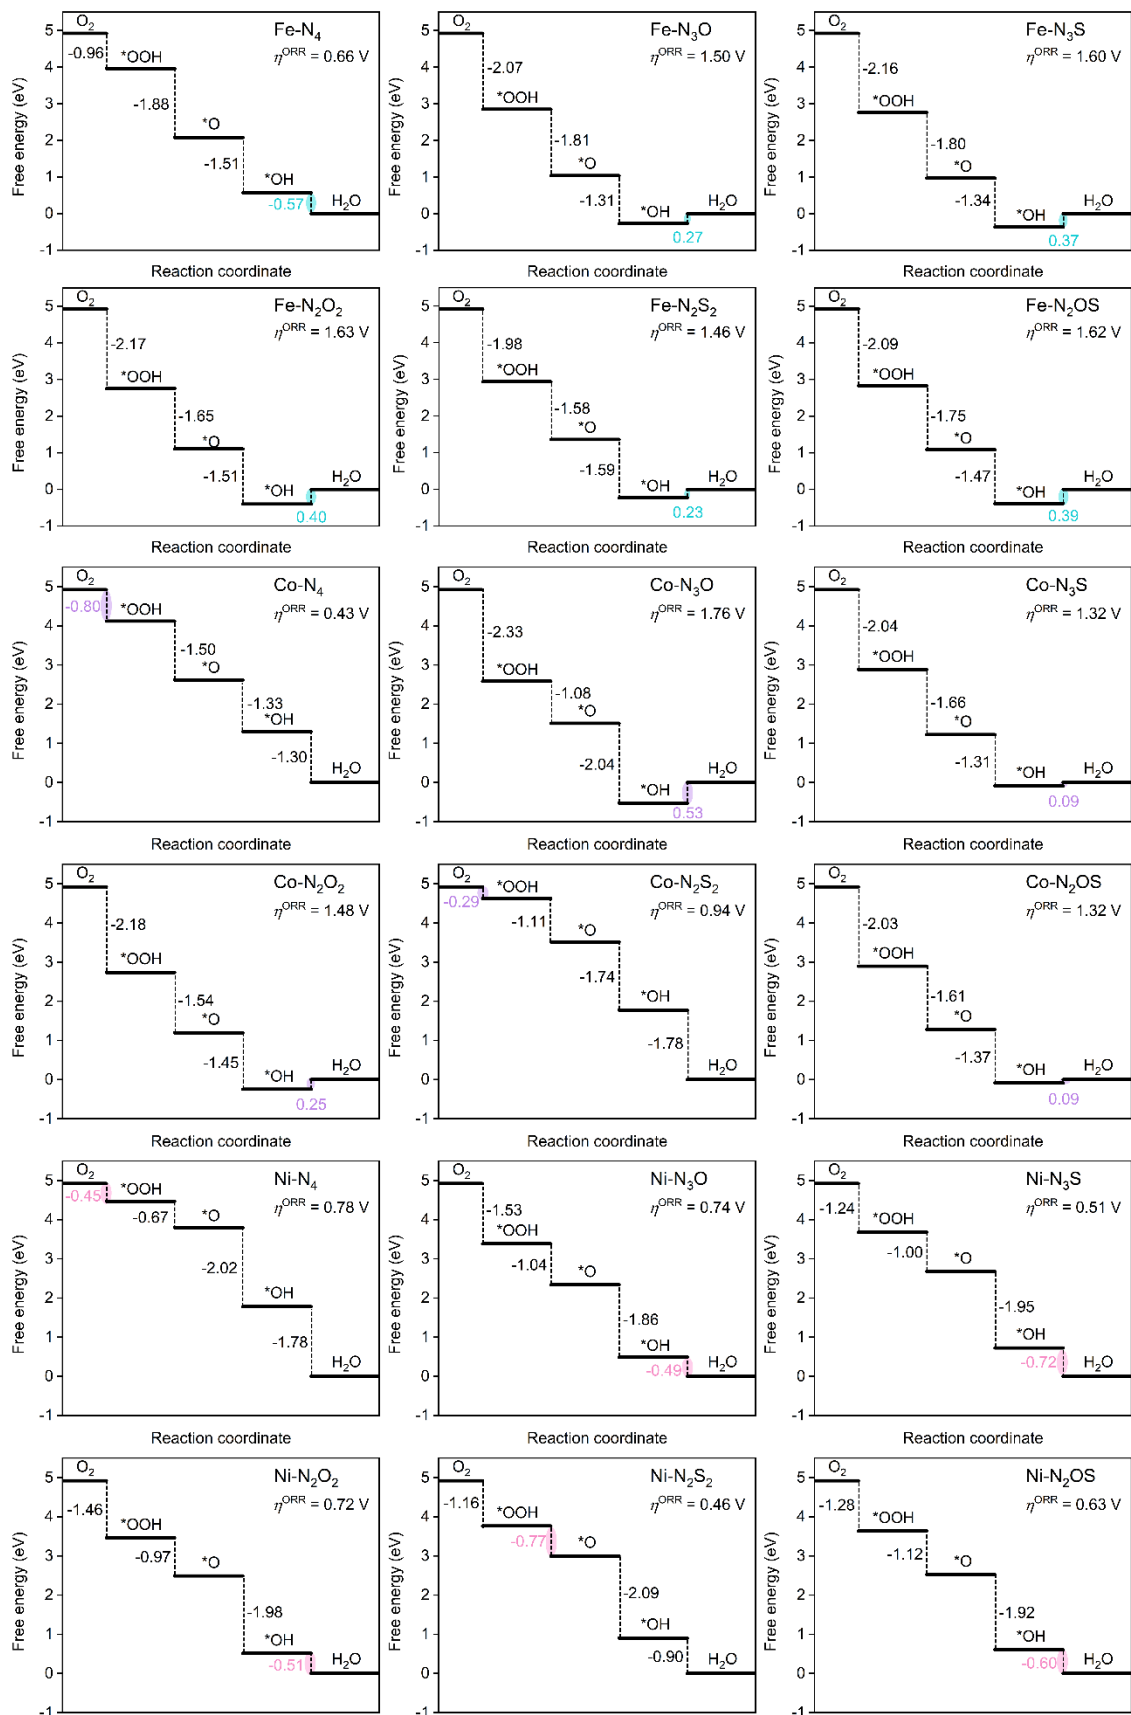

**Figure S17.** Free energy diagram for  $4e^-$  ORR R on Fe/Co/Ni- $N_xO_yS_z$ -Por-COFs ( $U = 0$  V,  $pH = 0$ ). The colored shadows specify the potential limiting step (PDS).

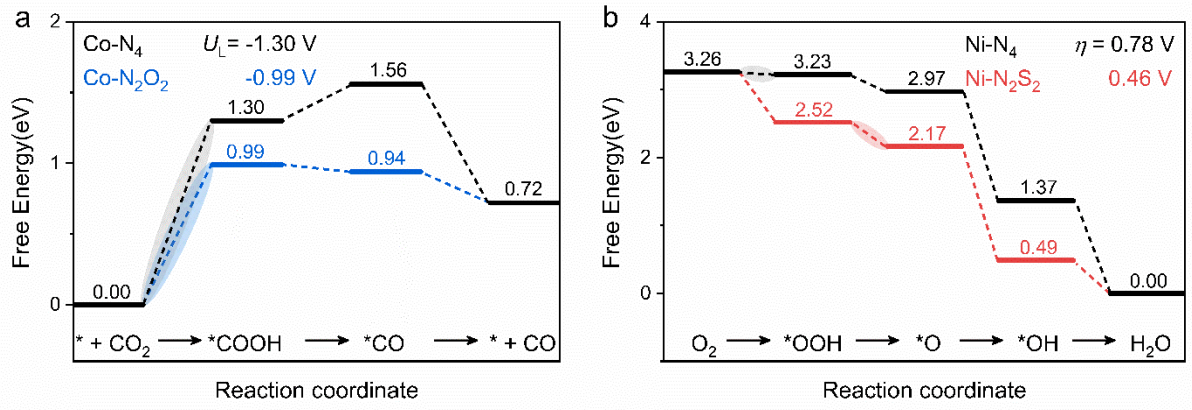

**Figure S18.** Free energy diagrams that computed at pH = 7 of a) CO<sub>2</sub>RR on Co-N<sub>4</sub>-and Co-N<sub>2</sub>O<sub>2</sub>-Por-COFs and b) ORR on Ni-N<sub>4</sub>-and Ni-N<sub>2</sub>S<sub>2</sub>-Por-COFs.

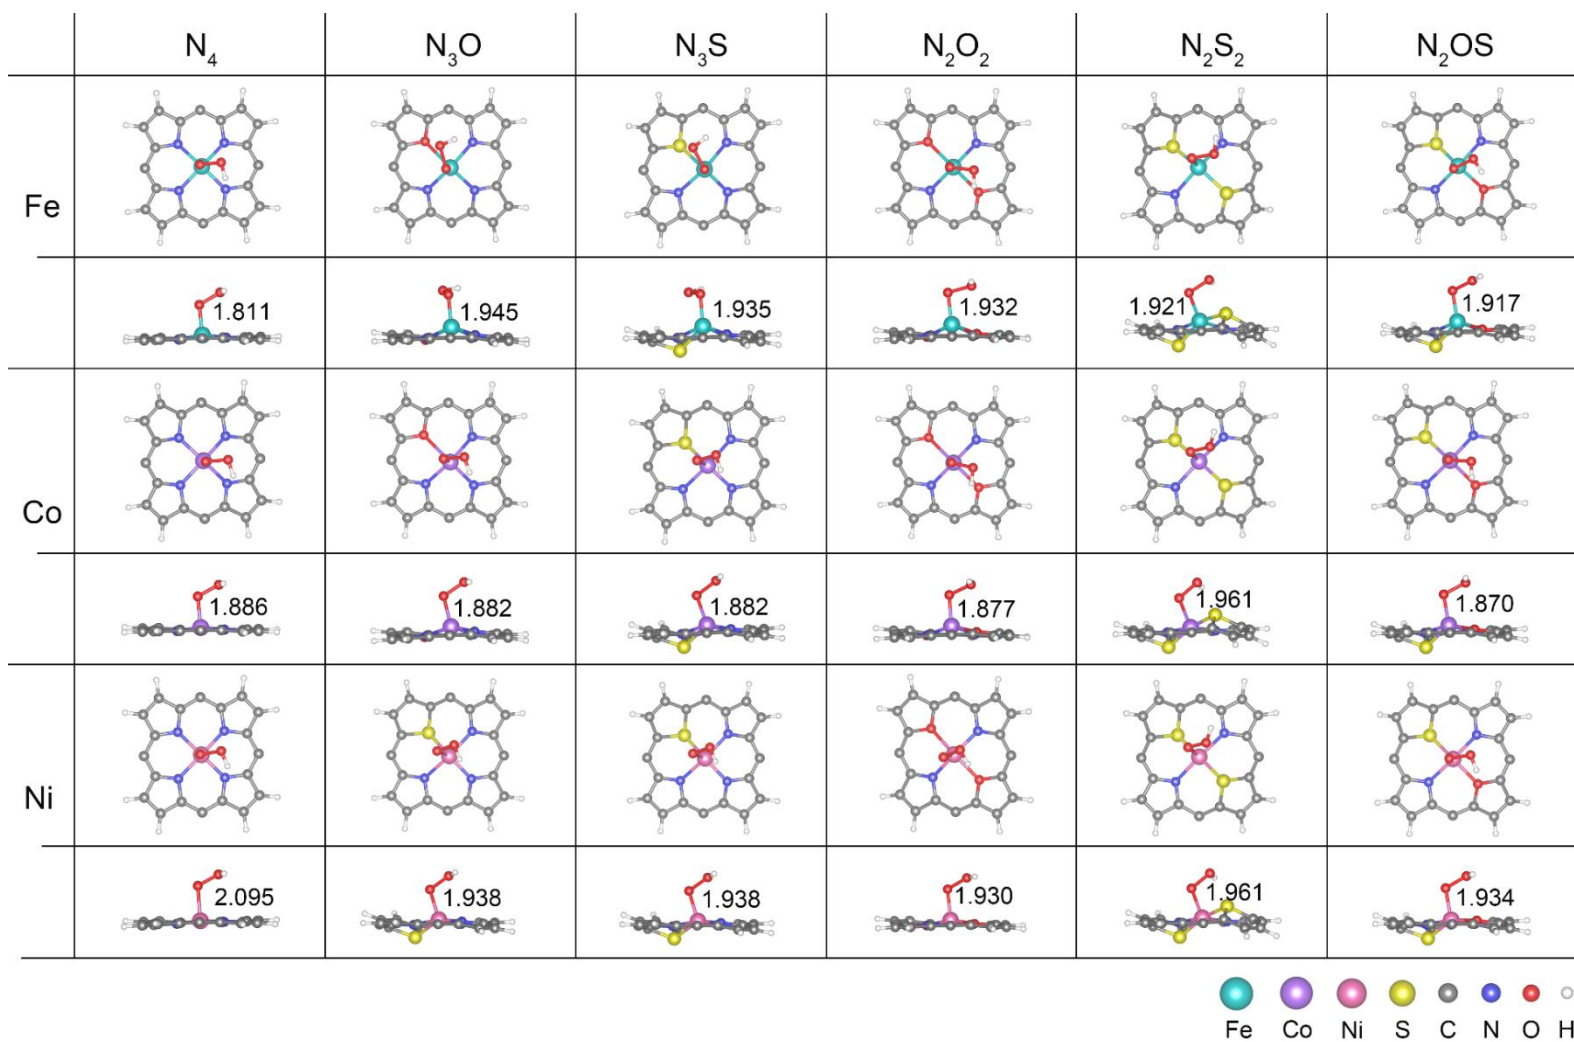

**Figure S19.** Optimized configurations of the \*OOH intermediate on Fe/Co/Ni- $N_xO_yS_z$ -Por-COFs. The M–O bond lengths (in Å) are present. For clarity, the tetraphenyl and the p-phenylenediamine (PPDA) moieties of M- $N_xO_yS_z$ -Por-COFs are not shown.

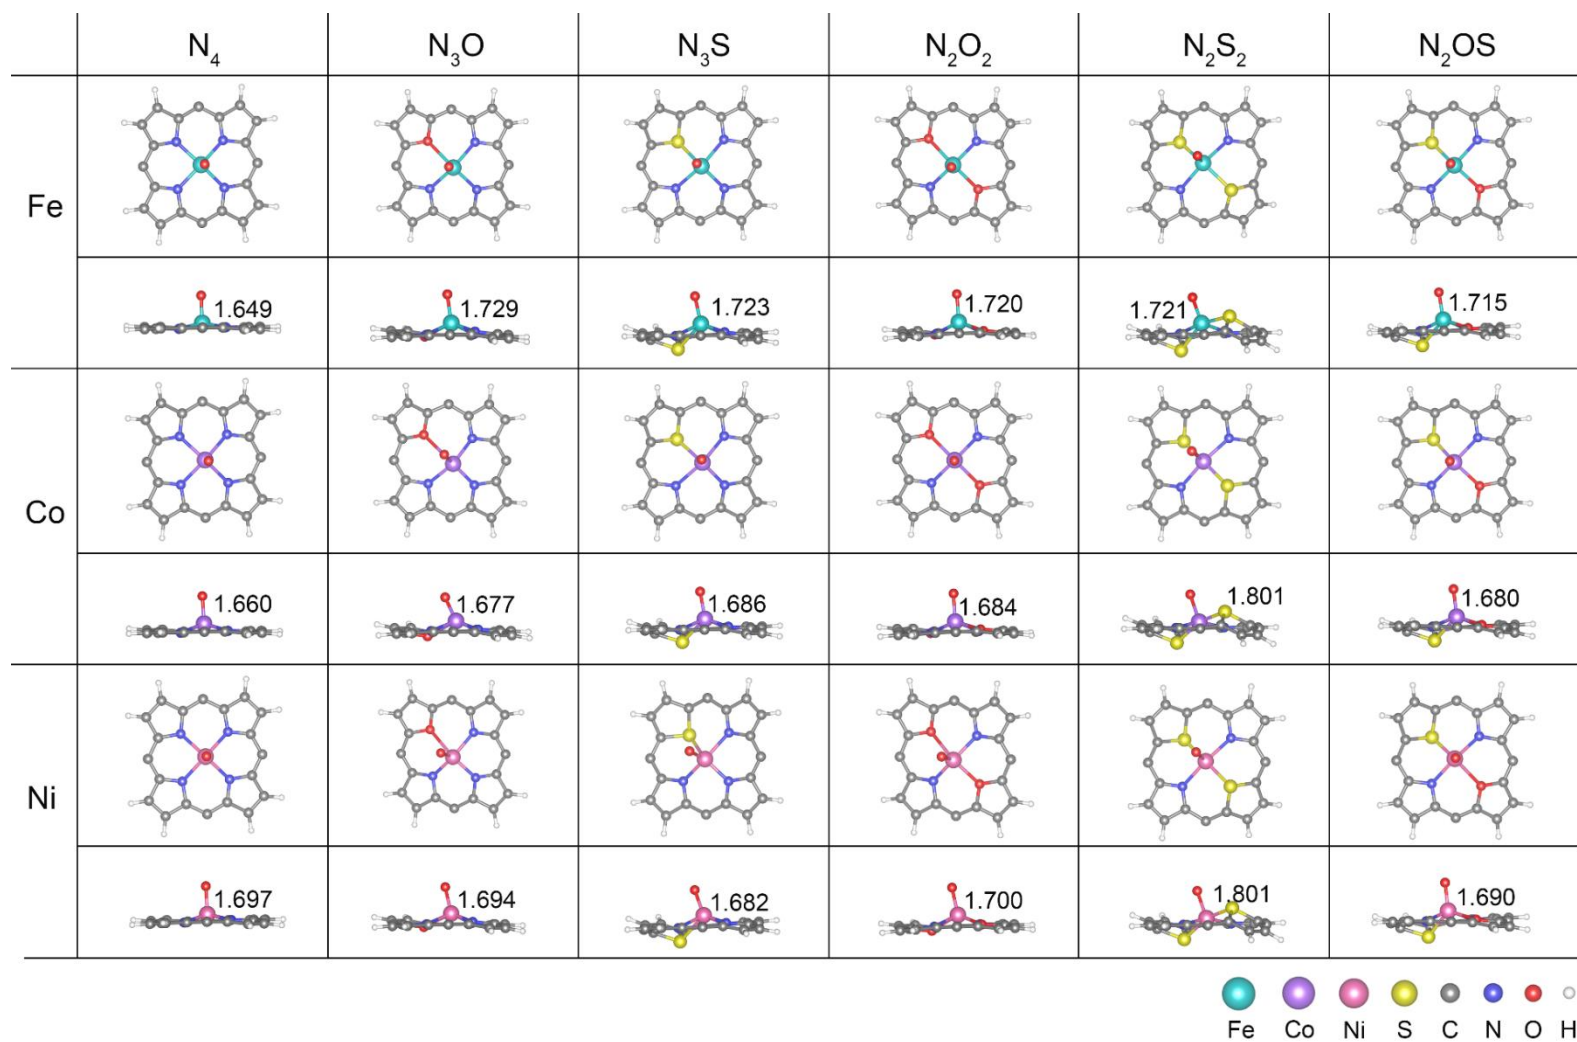

**Figure S20.** Optimized configurations of the \*O intermediate on Fe/Co/Ni- $N_xO_yS_z$ -Por-COFs. The M–O bond lengths (in Å) are present. For clarity, the tetraphenyl and the p-phenylenediamine (PPDA) moieties of M- $N_xO_yS_z$ -Por-COFs are not shown.

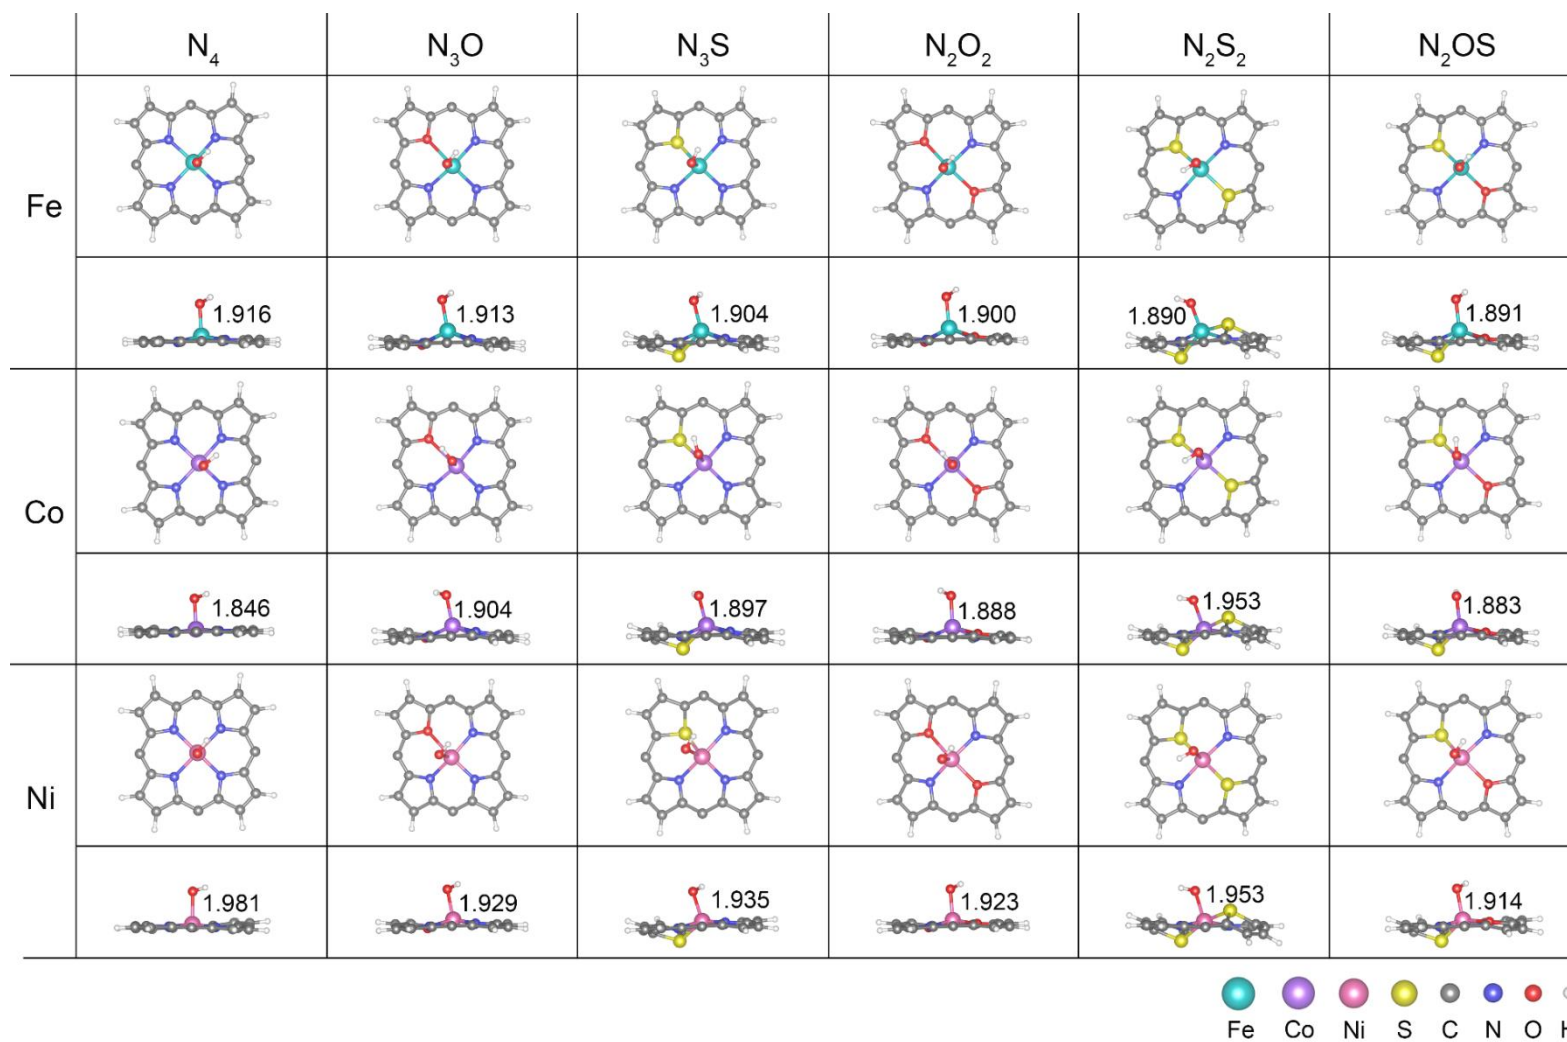

**Figure S21.** Optimized configurations of the \*OH intermediate on Fe/Co/Ni- $N_xO_yS_z$ -Por-COFs. The M–O bond lengths (in Å) are present. For clarity, the tetraphenyl and the p-phenylenediamine (PPDA) moieties of M- $N_xO_yS_z$ -Por-COFs are not shown.



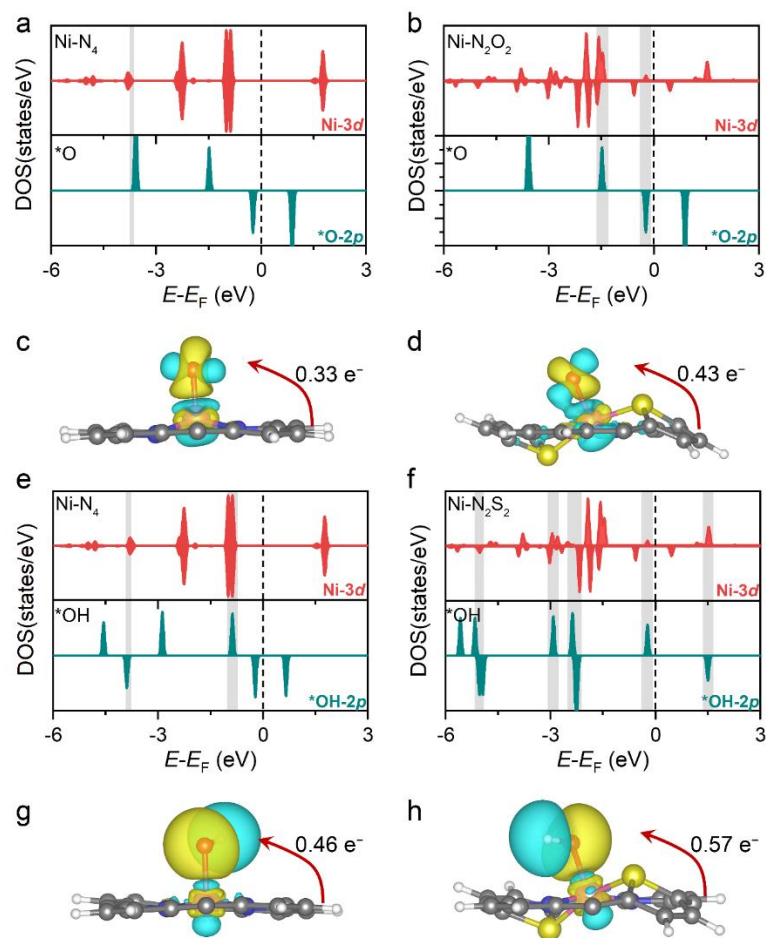

**Figure S22.** Projected electronic densities of states (PDOS) and charge density difference (CDD) of a-d) \*O and e-h) \*OH intermediates absorbed on Ni-N<sub>4</sub>-, Ni-N<sub>2</sub>S<sub>2</sub>-Por-COFs. The cyan/yellow colors indicate the regions of electron loss/gain. Isosurfaces of charge density are set to 0.005 e Å<sup>-3</sup>. For clarity, the tetraphenyl and the p-phenylenediamine (PPDA) moieties of M-N<sub>x</sub>O<sub>y</sub>S<sub>z</sub>-Por-COFs are not shown.

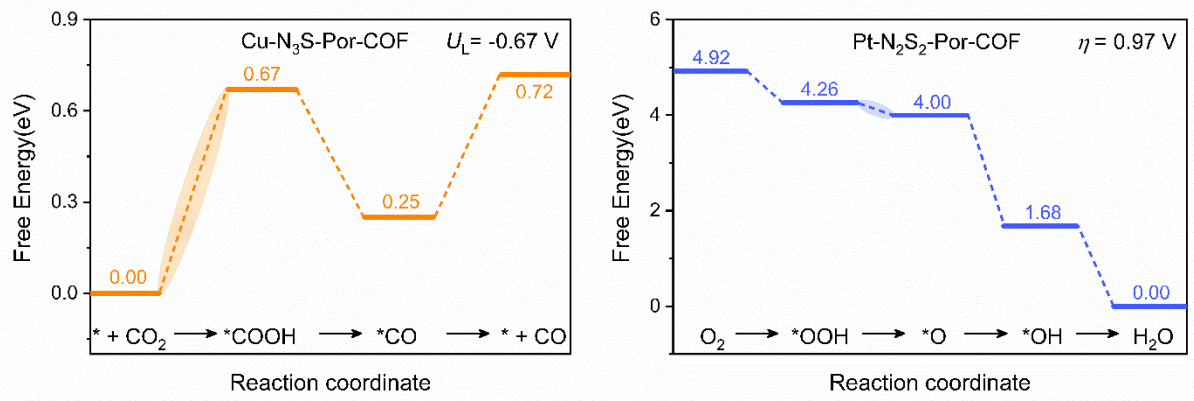

**Figure S23.** Free-energy diagram for a) CO<sub>2</sub>RR-to-CO on Cu-N<sub>3</sub>S-Por-COF and for b) ORR-to-H<sub>2</sub>O on Pt-N<sub>2</sub>S<sub>2</sub>-Por-COF.

## Supplementary Tables

**Table S1.** The values of U-J parameters for DFT/PBE+U calculations.

|     | Fe   | Co   | Ni   | Cu   | Pt   |
|-----|------|------|------|------|------|
| U-J | 3.29 | 3.42 | 3.40 | 3.87 | 3.00 |

**Table S2.** Relative free energies (eV) with different magnetic moments  $M$  ( $\mu_B$ ) for the intermediates adsorbed on Fe-Por-COFs at 298.15 K. For each species, the most stable spin state is highlighted in bold. The optimized value of default-M is reported as  $M_{opt}$ .

|          | Fe-N <sub>4</sub> -Por-COF |             |             |           | Fe-N <sub>3</sub> O-Por-COF |             |             |           | Fe-N <sub>3</sub> S-Por-COF |             |             |           |
|----------|----------------------------|-------------|-------------|-----------|-----------------------------|-------------|-------------|-----------|-----------------------------|-------------|-------------|-----------|
|          | default                    | 3           | 5           | $M_{opt}$ | default                     | 3           | 5           | $M_{opt}$ | default                     | 3           | 5           | $M_{opt}$ |
| G(*)     | 0.01                       | 0.09        | <b>0.00</b> | /         | 1.15                        | <b>0.00</b> | 0.79        | /         | 0.15                        | 0.01        | <b>0.00</b> | /         |
| G(*COOH) | <b>0.00</b>                | 0.01        | 0.04        | -1.15     | 0.06                        | <b>0.00</b> | 0.06        | /         | <b>0.00</b>                 | 0.13        | 0.01        | 0.01      |
| G(*CO)   | 0.01                       | 0.01        | <b>0.00</b> | /         | 0.58                        | 0.58        | <b>0.00</b> | /         | 0.54                        | 0.01        | <b>0.00</b> | /         |
| G(*H)    | <b>0.00</b>                | 0.01        | 0.01        | 1.19      | <b>0.00</b>                 | 0.03        | 0.03        | -0.01     | <b>0.00</b>                 | 0.02        | 0.04        | -0.01     |
| G(*OOH)  | 0.01                       | <b>0.00</b> | 0.01        | /         | 1.15                        | 0.03        | <b>0.00</b> | /         | 0.78                        | 0.02        | <b>0.00</b> | /         |
| G(*O)    | 0.03                       | 0.01        | <b>0.00</b> | /         | 0.69                        | 0.03        | <b>0.00</b> | /         | 0.43                        | <b>0.00</b> | 0.01        | /         |
| G(*OH)   | 0.01                       | 0.01        | <b>0.00</b> | /         | 1.40                        | 0.01        | <b>0.00</b> | /         | 0.96                        | <b>0.00</b> | 0.01        | /         |

  

|          | Fe-N <sub>2</sub> O <sub>2</sub> -Por-COF |             |             |           | Fe-N <sub>2</sub> S <sub>2</sub> -Por-COF |             |             |           | Fe-N <sub>2</sub> OS-Por-COF |             |             |           |
|----------|-------------------------------------------|-------------|-------------|-----------|-------------------------------------------|-------------|-------------|-----------|------------------------------|-------------|-------------|-----------|
|          | default                                   | 3           | 5           | $M_{opt}$ | default                                   | 3           | 5           | $M_{opt}$ | default                      | 3           | 5           | $M_{opt}$ |
| G(*)     | 0.01                                      | 0.01        | <b>0.00</b> | /         | <b>0.00</b>                               | 0.01        | 0.04        | 1.62      | 0.98                         | 0.33        | <b>0.00</b> | /         |
| G(*COOH) | 0.55                                      | 0.55        | <b>0.00</b> | /         | 0.29                                      | <b>0.00</b> | 0.01        | /         | 0.59                         | 0.01        | <b>0.00</b> | /         |
| G(*CO)   | 0.80                                      | 0.80        | <b>0.00</b> | /         | 0.47                                      | 0.01        | <b>0.00</b> | /         | 0.66                         | 0.66        | <b>0.00</b> | /         |
| G(*H)    | <b>0.00</b>                               | 0.48        | 0.09        | 1.74      | <b>0.00</b>                               | 0.08        | 0.04        | 1.00      | 0.13                         | 0.13        | <b>0.00</b> | /         |
| G(*OOH)  | <b>0.00</b>                               | 0.02        | 0.06        | 1.36      | 0.82                                      | 0.69        | <b>0.00</b> | /         | 0.75                         | 0.01        | <b>0.00</b> | /         |
| G(*O)    | 0.35                                      | <b>0.00</b> | 0.36        | /         | 0.38                                      | 0.01        | <b>0.00</b> | /         | 0.34                         | <b>0.00</b> | 0.02        | /         |
| G(*OH)   | 1.70                                      | 0.01        | <b>0.00</b> | /         | <b>0.00</b>                               | 0.03        | 0.03        | 3.00      | 1.57                         | 0.01        | <b>0.00</b> | /         |

**Table S3.** Relative free energies (eV) with different magnetic moments  $M$  ( $\mu_B$ ) for the intermediates adsorbed on Co-Por-COFs at 298.15 K. For each species, the most stable spin state is highlighted in bold. The optimized value of default-M is reported as  $M_{opt}$ .

|           | Co-N <sub>4</sub> -Por-COF |             |             |           | Co-N <sub>3</sub> O-Por-COF |             |             |           | Co-N <sub>3</sub> S-Por-COF |             |             |           |
|-----------|----------------------------|-------------|-------------|-----------|-----------------------------|-------------|-------------|-----------|-----------------------------|-------------|-------------|-----------|
|           | default                    | 2           | 4           | $M_{opt}$ | default                     | 2           | 4           | $M_{opt}$ | default                     | 2           | 4           | $M_{opt}$ |
| G (*)     | <b>0.00</b>                | 1.20        | 0.16        | -1.05     | 0.12                        | 0.12        | <b>0.00</b> | /         | 0.01                        | 0.19        | <b>0.00</b> | /         |
| G (*COOH) | <b>0.00</b>                | 0.02        | 0.01        | 0.01      | 0.01                        | <b>0.00</b> | 0.01        | /         | 0.01                        | <b>0.00</b> | 0.01        | /         |
| G (*CO)   | 0.01                       | 0.05        | <b>0.00</b> | /         | 0.01                        | 0.79        | <b>0.00</b> | /         | 0.01                        | 0.48        | <b>0.00</b> | /         |
| G (*H)    | 0.01                       | <b>0.00</b> | 0.01        | /         | 0.16                        | 0.13        | <b>0.00</b> | /         | 0.01                        | 0.01        | <b>0.00</b> | /         |
| G(*OOH)   | 0.29                       | <b>0.00</b> | 0.17        | /         | 0.56                        | 0.51        | <b>0.00</b> | /         | 0.00                        | 0.72        | 0.01        | 4.77      |
| G(*O)     | 0.28                       | <b>0.00</b> | 0.11        | /         | 0.62                        | 0.63        | <b>0.00</b> | /         | 0.02                        | 0.83        | <b>0.00</b> | /         |
| G(*OH)    | 0.25                       | 0.01        | <b>0.00</b> | /         | 0.74                        | 0.81        | <b>0.00</b> | /         | 0.02                        | 0.74        | <b>0.00</b> | /         |

  

|           | Co-N <sub>2</sub> O <sub>2</sub> -Por-COF |             |             |           | Co-N <sub>2</sub> S <sub>2</sub> -Por-COF |             |             |         | Co-N <sub>2</sub> OS-Por-COF |      |             |       |
|-----------|-------------------------------------------|-------------|-------------|-----------|-------------------------------------------|-------------|-------------|---------|------------------------------|------|-------------|-------|
|           | default                                   | 2           | 4           | $M_{opt}$ | default                                   | 2           | 4           | default | 2                            | 4    | $M_{opt}$   | 4     |
| G (*)     | 0.47                                      | 0.89        | <b>0.00</b> | /         | <b>0.00</b>                               | 0.01        | 0.01        | 1.00    | <b>0.00</b>                  | 0.01 | 0.01        | 1.08  |
| G (*COOH) | 0.01                                      | <b>0.00</b> | 0.01        | /         | 0.01                                      | 0.01        | <b>0.00</b> | /       | 0.01                         | 0.01 | <b>0.00</b> | /     |
| G (*CO)   | 0.01                                      | <b>0.00</b> | 0.01        | /         | 0.01                                      | <b>0.00</b> | 0.01        | /       | 0.40                         | 0.00 | 0.01        | /     |
| G (*H)    | <b>0.00</b>                               | 0.01        | 0.01        | 1.99      | <b>0.00</b>                               | 0.01        | 0.01        | 0.00    | <b>0.00</b>                  | 0.01 | 0.01        | 0.00  |
| G(*OOH)   | 0.02                                      | 0.76        | <b>0.00</b> | /         | 0.01                                      | 0.01        | <b>0.00</b> | /       | <b>0.00</b>                  | 0.68 | 0.64        | -0.01 |
| G(*O)     | <b>0.00</b>                               | 0.23        | 1.19        | -2.04     | 0.03                                      | 0.06        | <b>0.00</b> | /       | 0.01                         | 0.01 | <b>0.00</b> | /     |
| G(*OH)    | 0.01                                      | 0.81        | <b>0.00</b> | /         | 0.01                                      | 0.01        | <b>0.00</b> | /       | 0.03                         | 0.73 | <b>0.00</b> | /     |

**Table S4.** Relative free energies (eV) with different magnetic moments  $M$  ( $\mu_B$ ) for the intermediates adsorbed on Ni-Por-COFs at 298.15 K. For each species, the most stable spin state is highlighted in bold. The optimized value of default-M is reported as  $M_{\text{opt}}$ .

|           | Ni-N <sub>4</sub> -Por-COF |             |                  | Ni-N <sub>3</sub> O-Por-COF |             |                  | Ni-N <sub>3</sub> S-Por-COF |             |                  |
|-----------|----------------------------|-------------|------------------|-----------------------------|-------------|------------------|-----------------------------|-------------|------------------|
|           | default                    | 3           | $M_{\text{opt}}$ | default                     | 3           | $M_{\text{opt}}$ | default                     | 3           | $M_{\text{opt}}$ |
| G (*)     | <b>0.00</b>                | 0.01        | 0.01             | <b>0.00</b>                 | 0.01        | 3.49             | 0.01                        | <b>0.00</b> | /                |
| G (*COOH) | 0.01                       | 0.00        | /                | <b>0.00</b>                 | 0.01        | -0.01            | <b>0.00</b>                 | 0.46        | 2.00             |
| G (*CO)   | <b>0.00</b>                | 0.01        | 0.01             | 0.01                        | <b>0.00</b> | /                | 0.01                        | <b>0.00</b> | /                |
| G (*H)    | 0.01                       | <b>0.00</b> | /                | <b>0.00</b>                 | 0.32        | -2.00            | <b>0.00</b>                 | 0.45        | 2.00             |
| G(*OOH)   | 0.01                       | <b>0.00</b> | /                | <b>0.00</b>                 | 0.40        | 0.01             | <b>0.00</b>                 | 0.34        | 2.00             |
| G(*O)     | <b>0.00</b>                | 0.33        | -4.05            | 0.45                        | <b>0.00</b> | /                | <b>0.00</b>                 | 0.47        | 3.00             |
| G(*OH)    | <b>0.00</b>                | 0.01        | 1.00             | 0.01                        | <b>0.00</b> | /                | <b>0.00</b>                 | 0.41        | 2.00             |

  

|           | Ni-N <sub>2</sub> O <sub>2</sub> -Por-COF |             |                  | Ni-N <sub>2</sub> S <sub>2</sub> -Por-COF |             |                  | Ni-N <sub>2</sub> OS-Por-COF |             |                  |
|-----------|-------------------------------------------|-------------|------------------|-------------------------------------------|-------------|------------------|------------------------------|-------------|------------------|
|           | default                                   | 3           | $M_{\text{opt}}$ | default                                   | 3           | $M_{\text{opt}}$ | default                      | 3           | $M_{\text{opt}}$ |
| G (*)     | 0.01                                      | <b>0.00</b> | /                | 0.01                                      | <b>0.00</b> | /                | <b>0.00</b>                  | 0.01        | 0.27             |
| G (*COOH) | <b>0.00</b>                               | 0.30        | 3.00             | 0.01                                      | <b>0.00</b> | /                | 0.01                         | <b>0.00</b> | /                |
| G (*CO)   | <b>0.00</b>                               | 0.01        | 0.01             | <b>0.00</b>                               | 0.01        | 0.01             | 0.01                         | <b>0.00</b> | /                |
| G (*H)    | <b>0.00</b>                               | 0.14        | 1.00             | <b>0.00</b>                               | 0.01        | 1.00             | 0.01                         | <b>0.00</b> | /                |
| G(*OOH)   | <b>0.00</b>                               | 0.01        | 2.14             | <b>0.00</b>                               | 0.01        | 1.00             | 0.04                         | <b>0.00</b> | /                |
| G(*O)     | 0.01                                      | <b>0.00</b> | /                | 0.29                                      | 0.00        | /                | 0.33                         | <b>0.00</b> | /                |
| G(*OH)    | <b>0.00</b>                               | 0.12        | 3.00             | <b>0.00</b>                               | 0.01        | 1.00             | 0.22                         | <b>0.00</b> | /                |

**Table S5.** Calculated zero-point energy (ZPE, eV) and entropic correction (TS, eV) of \*O<sub>2</sub>, \*OOH, \*O and \*OH for Fe/Co/Ni-N<sub>x</sub>O<sub>y</sub>S<sub>z</sub>-Por-COFs at T = 298.15K.

| System                           | *OOH    |        | *O    |      | *OH    |       |
|----------------------------------|---------|--------|-------|------|--------|-------|
|                                  | ZPE*OOH | TS*OOH | ZPE*O | TS*O | ZPE*OH | TS*OH |
| Fe-N <sub>4</sub>                | 0.43    | 0.16   | 0.07  | 0.06 | 0.33   | 0.12  |
| Fe-N <sub>3</sub> O              | 0.42    | 0.21   | 0.06  | 0.08 | 0.33   | 0.13  |
| Fe-N <sub>3</sub> S              | 0.43    | 0.22   | 0.06  | 0.08 | 0.32   | 0.14  |
| Fe-N <sub>2</sub> O <sub>2</sub> | 0.43    | 0.22   | 0.06  | 0.08 | 0.33   | 0.14  |
| Fe-N <sub>2</sub> S <sub>2</sub> | 0.43    | 0.20   | 0.06  | 0.08 | 0.32   | 0.14  |
| Fe-N <sub>2</sub> OS             | 0.42    | 0.17   | 0.05  | 0.10 | 0.33   | 0.13  |
| Co-N <sub>4</sub>                | 0.45    | 0.13   | 0.06  | 0.08 | 0.35   | 0.09  |
| Co-N <sub>3</sub> O              | 0.40    | 0.13   | 0.06  | 0.07 | 0.32   | 0.15  |
| Co-N <sub>3</sub> S              | 0.41    | 0.24   | 0.06  | 0.08 | 0.33   | 0.13  |
| Co-N <sub>2</sub> O <sub>2</sub> | 0.42    | 0.21   | 0.06  | 0.07 | 0.34   | 0.11  |
| Co-N <sub>2</sub> S <sub>2</sub> | 0.42    | 0.23   | 0.04  | 0.11 | 0.33   | 0.13  |
| Co-N <sub>2</sub> OS             | 0.42    | 0.24   | 0.06  | 0.09 | 0.33   | 0.14  |
| Ni-N <sub>4</sub>                | 0.43    | 0.21   | 0.05  | 0.08 | 0.32   | 0.09  |
| Ni-N <sub>3</sub> O              | 0.42    | 0.21   | 0.05  | 0.08 | 0.33   | 0.11  |
| Ni-N <sub>3</sub> S              | 0.42    | 0.18   | 0.05  | 0.08 | 0.33   | 0.12  |
| Ni-N <sub>2</sub> O <sub>2</sub> | 0.43    | 0.20   | 0.05  | 0.09 | 0.33   | 0.12  |
| Ni-N <sub>2</sub> S <sub>2</sub> | 0.42    | 0.21   | 0.04  | 0.11 | 0.33   | 0.13  |
| Ni-N <sub>2</sub> OS             | 0.42    | 0.16   | 0.06  | 0.08 | 0.34   | 0.12  |

**Table S6.** Calculated zero-point energy (ZPE, eV) and entropic correction (TS, eV) of \*CO<sub>2</sub>, \*COOH, \*CO and \*H for Fe/Co/Ni-N<sub>x</sub>O<sub>y</sub>S<sub>z</sub>-Por-COFs at T = 298.15K.

| System                           | *COOH    |         | *CO    |       | *H    |      |
|----------------------------------|----------|---------|--------|-------|-------|------|
|                                  | ZPE*COOH | TS*COOH | ZPE*CO | TS*CO | ZPE*H | TS*H |
| Fe-N <sub>4</sub>                | 0.61     | 0.23    | 0.19   | 0.10  | 0.18  | 0.02 |
| Fe-N <sub>3</sub> O              | 0.58     | 0.19    | 0.19   | 0.16  | 0.19  | 0.01 |
| Fe-N <sub>3</sub> S              | 0.62     | 0.19    | 0.18   | 0.11  | 0.18  | 0.01 |
| Fe-N <sub>2</sub> O <sub>2</sub> | 0.59     | 0.25    | 0.18   | 0.10  | 0.13  | 0.03 |
| Fe-N <sub>2</sub> S <sub>2</sub> | 0.59     | 0.18    | 0.19   | 0.15  | 0.14  | 0.04 |
| Fe-N <sub>2</sub> OS             | 0.58     | 0.27    | 0.18   | 0.18  | 0.18  | 0.01 |
| Co-N <sub>4</sub>                | 0.62     | 0.22    | 0.18   | 0.18  | 0.20  | 0.01 |
| Co-N <sub>3</sub> O              | 0.68     | 0.13    | 0.19   | 0.15  | 0.18  | 0.01 |
| Co-N <sub>3</sub> S              | 0.62     | 0.22    | 0.19   | 0.16  | 0.20  | 0.01 |
| Co-N <sub>2</sub> O <sub>2</sub> | 0.61     | 0.23    | 0.20   | 0.13  | 0.17  | 0.02 |
| Co-N <sub>2</sub> S <sub>2</sub> | 0.60     | 0.23    | 0.18   | 0.17  | 0.21  | 0.01 |
| Co-N <sub>2</sub> OS             | 0.62     | 0.15    | 0.19   | 0.10  | 0.18  | 0.01 |
| Ni-N <sub>4</sub>                | 0.62     | 0.22    | 0.22   | 0.16  | 0.17  | 0.03 |
| Ni-N <sub>3</sub> O              | 0.59     | 0.13    | 0.19   | 0.16  | 0.16  | 0.01 |
| Ni-N <sub>3</sub> S              | 0.59     | 0.23    | 0.18   | 0.12  | 0.16  | 0.02 |
| Ni-N <sub>2</sub> O <sub>2</sub> | 0.59     | 0.18    | 0.20   | 0.15  | 0.16  | 0.02 |
| Ni-N <sub>2</sub> S <sub>2</sub> | 0.60     | 0.23    | 0.19   | 0.15  | 0.16  | 0.01 |
| Ni-N <sub>2</sub> OS             | 0.60     | 0.23    | 0.19   | 0.10  | 0.17  | 0.02 |



**Table S7.** Hyperparameters of three machine learning algorithms.

| <b>Target Value</b>  | <b>Algorithm</b> | <b>Hyperparameter</b>                                                       |
|----------------------|------------------|-----------------------------------------------------------------------------|
| $U_L^{\text{CO2RR}}$ | RFR              | n_estimators=1000                                                           |
|                      | GBR              | n_estimators=1000, learning_rate=0.002,                                     |
|                      | XGBoost          | n_estimators=1000, learning_rate=0.005,<br>colsample_bytree=1, max_depth=10 |
| $\eta^{\text{ORR}}$  | RFR              | n_estimators=1000                                                           |
|                      | GBR              | n_estimators=1000, learning_rate=0.004                                      |
|                      | XGBoost          | n_estimators=500, learning_rate=0.009,<br>colsample_bytree=1, max_depth=5   |

**Table S8.** Calculated adsorption energy  $\Delta E_{\text{ads\_CO}_2}(\text{CO}_2)$ , bond lengths and bond angle of  $^*\text{CO}_2$  absorbed on Fe/Co/Ni-N<sub>x</sub>O<sub>y</sub>S<sub>z</sub>-Por-COFs.

| Catalyst                         | $\Delta E_{\text{ads\_CO}_2}$ (eV) | Bond Length           |            |                       |            | Bond Angle                  |            |
|----------------------------------|------------------------------------|-----------------------|------------|-----------------------|------------|-----------------------------|------------|
|                                  |                                    | $d_{\text{C-O1}}$ (Å) | $\Delta_1$ | $d_{\text{C-O2}}$ (Å) | $\Delta_2$ | $\angle_{\text{O-C-O}}$ (°) | $\Delta_3$ |
| Fe-N <sub>4</sub>                | -0.22                              | 1.18                  | 1.72%      | 1.17                  | 0.86%      | 179.32                      | 0.38%      |
| Fe-N <sub>3</sub> O              | -0.12                              | 1.24                  | 6.90%      | 1.22                  | 5.17%      | 141.72                      | 21.27%     |
| Fe-N <sub>3</sub> S              | -0.11                              | 1.18                  | 1.72%      | 1.17                  | 0.86%      | 179.82                      | 0.10%      |
| Fe-N <sub>2</sub> O <sub>2</sub> | -0.14                              | 1.25                  | 7.76%      | 1.25                  | 7.76%      | 133.58                      | 25.79%     |
| Fe-N <sub>2</sub> S <sub>2</sub> | -0.19                              | 1.17                  | 0.86%      | 1.18                  | 1.72%      | 179.40                      | 0.33%      |
| Fe-N <sub>2</sub> OS             | 0.00                               | 1.22                  | 5.17%      | 1.26                  | 8.62%      | 141.67                      | 21.29%     |
| Co-N <sub>4</sub>                | -0.25                              | 1.18                  | 1.72%      | 1.17                  | 0.86%      | 179.63                      | 0.21%      |
| Co-N <sub>3</sub> O              | -0.34                              | 1.24                  | 6.90%      | 1.23                  | 6.03%      | 138.94                      | 22.81%     |
| Co-N <sub>3</sub> S              | -0.12                              | 1.18                  | 1.72%      | 1.17                  | 0.86%      | 179.64                      | 0.20 %     |
| Co-N <sub>2</sub> O <sub>2</sub> | -0.25                              | 1.23                  | 6.03%      | 1.21                  | 4.31%      | 145.92                      | 18.93%     |
| Co-N <sub>2</sub> S <sub>2</sub> | 0.02                               | 1.18                  | 1.72%      | 1.18                  | 1.72%      | 179.85                      | 0.08%      |
| Co-N <sub>2</sub> OS             | -0.24                              | 1.22                  | 5.17%      | 1.21                  | 4.31%      | 148.92                      | 17.27%     |
| Ni-N <sub>4</sub>                | -0.23                              | 1.18                  | 1.72%      | 1.18                  | 1.72%      | 179.88                      | 0.07%      |
| Ni-N <sub>3</sub> O              | -0.12                              | 1.21                  | 4.31%      | 1.21                  | 4.31%      | 148.64                      | 17.42%     |
| Ni-N <sub>3</sub> S              | -0.27                              | 1.18                  | 1.72%      | 1.18                  | 1.72%      | 179.51                      | 0.27%      |
| Ni-N <sub>2</sub> O <sub>2</sub> | -0.18                              | 1.21                  | 4.31%      | 1.21                  | 4.31%      | 148.45                      | 17.53%     |
| Ni-N <sub>2</sub> S <sub>2</sub> | -0.26                              | 1.18                  | 1.72%      | 1.18                  | 1.72%      | 179.83                      | 0.09%      |
| Ni-N <sub>2</sub> OS             | -0.10                              | 1.21                  | 4.31%      | 1.21                  | 4.31%      | 150.99                      | 16.12%     |

**Note:**

$\Delta_{1-2}$  is the degree to which the C-O bond length of the adsorbed  $^*\text{CO}_2$ -moiety changes with respect to the C-O bond length (1.16 Å) of the gas  $\text{CO}_2$  molecule;  $\Delta_3$  is the degree to which the  $\angle_{\text{O-C-O}}$  of the adsorbed  $^*\text{CO}_2$ -moiety changes with respect to the  $\angle_{\text{O-C-O}}$  (180°) of the gas  $\text{CO}_2$  molecule.

$$\Delta_{1-2} = \left| \frac{d_{\text{C-O}}(^*\text{CO}_2) - 1.16}{1.16} \right|$$

$$\Delta_3 = \left| \frac{\angle_{\text{O-C-O}}(^*\text{CO}_2) - 180}{180} \right|$$

**Table S9.** Calculated adsorption energy,  $\Delta E_{\text{ads-O}_2}$ , and bond lengths of  $^*\text{O}_2$  absorbed on Fe/Co/Ni- $\text{N}_x\text{O}_y\text{S}_z$ -Por-COFs.

| Catalyst                         | $\Delta E_{\text{ads-O}_2}$ | Bond Length          |          |
|----------------------------------|-----------------------------|----------------------|----------|
|                                  |                             | $d_{\text{O-O}}$ (Å) | $\Delta$ |
| Fe-N <sub>4</sub>                | -0.42                       | 1.33                 | 9.92%    |
| Fe-N <sub>3</sub> O              | -1.41                       | 1.43                 | 18.18%   |
| Fe-N <sub>3</sub> S              | -1.47                       | 1.43                 | 18.18%   |
| Fe-N <sub>2</sub> O <sub>2</sub> | -1.58                       | 1.42                 | 17.36%   |
| Fe-N <sub>2</sub> S <sub>2</sub> | -1.25                       | 1.38                 | 14.05%   |
| Fe-N <sub>2</sub> OS             | -1.58                       | 1.42                 | 17.36%   |
| Co-N <sub>4</sub>                | -0.22                       | 1.24                 | 2.48%    |
| Co-N <sub>3</sub> O              | -1.57                       | 1.34                 | 10.74%   |
| Co-N <sub>3</sub> S              | -1.14                       | 1.34                 | 10.74%   |
| Co-N <sub>2</sub> O <sub>2</sub> | -1.28                       | 1.34                 | 10.74%   |
| Co-N <sub>2</sub> S <sub>2</sub> | -0.77                       | 1.33                 | 9.92%    |
| Co-N <sub>2</sub> OS             | -1.22                       | 1.38                 | 14.05%   |
| Ni-N <sub>4</sub>                | -0.25                       | 1.24                 | 2.48%    |
| Ni-N <sub>3</sub> O              | -0.82                       | 1.32                 | 9.09%    |
| Ni-N <sub>3</sub> S              | -0.74                       | 1.31                 | 8.26%    |
| Ni-N <sub>2</sub> O <sub>2</sub> | -0.74                       | 1.32                 | 9.09%    |
| Ni-N <sub>2</sub> S <sub>2</sub> | -0.18                       | 1.3                  | 7.44%    |
| Ni-N <sub>2</sub> OS             | -0.81                       | 1.31                 | 8.26%    |

**Note:**

$\Delta$  is the degree to which the O–O bond length of the adsorbed  $^*\text{O}_2$ -moiety changes with respect to the O–O bond length (1.21 Å) of the gas  $\text{O}_2$  molecule.

$$\Delta = \left| \frac{d_{\text{C-O}}(^*\text{O}_2) - 1.21}{1.21} \right|$$

**Table S10.** The feature values of each Por-COF. The features include the atomic number ( $N^{\text{atom}}$ ), the number of valence electron ( $n_e$ ), the number of  $d$  electron ( $n_d$ ), the covalent radius ( $r^{\text{atom}}$ , Å), the van der Waals radius ( $r^{\text{vdw}}$ , Å), the relative mass ( $m$ ), the Pauling electronegativity (EN), the electron affinity (EA, eV), the first ionization energy (IE, eV) of the central metal atoms ( $n_N$ ); the number of coordinated N atoms, the sum of valence electron count ( $\sum n_e$ ), the sum of  $p$  electron ( $\sum n_p$ ), the sum of covalent radius ( $\sum r^{\text{atom}}$ , Å), the sum of van der Waals radius ( $\sum r^{\text{vdw}}$ , Å), the sum of Pauling electronegativity ( $\sum \text{EN}$ ), the sum of electron affinity ( $\sum \text{EA}$ , eV) of the coordination structures; the bond lengths of M–X<sub>1</sub> ( $d_{\text{M-X1}}$ , Å), M–X<sub>2</sub> ( $d_{\text{M-X2}}$ , Å), M–N<sub>1</sub> ( $d_{\text{M-N1}}$ , Å) and M–N<sub>2</sub> ( $d_{\text{M-N2}}$ , Å).

| System                           | $N^{\text{atom}}$ | $n_e$ | $n_d$ | $r^{\text{atom}}$ | $r^{\text{vdw}}$ | $m$   | EN   | EA    | IE   | $n_N$ | $\sum n_e$ | $\sum n_p$ | $\sum r^{\text{atom}}$ | $\sum r^{\text{vdw}}$ | $\sum \text{EN}$ | $\sum \text{EA}$ | $d_{\text{M-X1}}$ | $d_{\text{M-X2}}$ | $d_{\text{M-N1}}$ | $d_{\text{M-N2}}$ |
|----------------------------------|-------------------|-------|-------|-------------------|------------------|-------|------|-------|------|-------|------------|------------|------------------------|-----------------------|------------------|------------------|-------------------|-------------------|-------------------|-------------------|
| Fe-N <sub>4</sub>                | 26.00             | 8.00  | 6.00  | 1.32              | 2.44             | 55.85 | 1.83 | 15.70 | 7.90 | 4.00  | 20.00      | 12.00      | 2.84                   | 6.64                  | 12.16            | 28.00            | 2.00              | 2.00              | 2.01              | 2.01              |
| Fe-N <sub>3</sub> O              | 26.00             | 8.00  | 6.00  | 1.32              | 2.44             | 55.85 | 1.83 | 15.70 | 7.90 | 3.00  | 21.00      | 13.00      | 2.79                   | 6.48                  | 12.56            | 162.00           | 2.23              | 2.00              | 2.03              | 2.03              |
| Fe-N <sub>3</sub> S              | 26.00             | 8.00  | 6.00  | 1.32              | 2.44             | 55.85 | 1.83 | 15.70 | 7.90 | 3.00  | 21.00      | 13.00      | 3.18                   | 6.87                  | 11.70            | 221.00           | 2.40              | 1.99              | 2.09              | 2.08              |
| Fe-N <sub>2</sub> O <sub>2</sub> | 26.00             | 8.00  | 6.00  | 1.32              | 2.44             | 55.85 | 1.83 | 15.70 | 7.90 | 2.00  | 22.00      | 14.00      | 2.74                   | 6.32                  | 12.96            | 296.00           | 2.18              | 2.18              | 2.01              | 2.01              |
| Fe-N <sub>2</sub> S <sub>2</sub> | 26.00             | 8.00  | 6.00  | 1.32              | 2.44             | 55.85 | 1.83 | 15.70 | 7.90 | 2.00  | 22.00      | 14.00      | 3.52                   | 7.10                  | 11.24            | 414.00           | 2.20              | 2.20              | 2.05              | 2.05              |
| Fe-N <sub>2</sub> OS             | 26.00             | 8.00  | 6.00  | 1.32              | 2.44             | 55.85 | 1.83 | 15.70 | 7.90 | 2.00  | 22.00      | 14.00      | 3.13                   | 6.71                  | 12.10            | 355.00           | 2.39              | 2.16              | 2.04              | 2.04              |
| Co-N <sub>4</sub>                | 27.00             | 9.00  | 7.00  | 1.26              | 2.40             | 58.93 | 1.88 | 63.70 | 7.88 | 4.00  | 20.00      | 12.00      | 2.84                   | 6.64                  | 12.16            | 28.00            | 1.98              | 1.98              | 1.99              | 1.99              |
| Co-N <sub>3</sub> O              | 27.00             | 9.00  | 7.00  | 1.26              | 2.40             | 58.93 | 1.88 | 63.70 | 7.88 | 3.00  | 21.00      | 13.00      | 2.79                   | 6.48                  | 12.56            | 162.00           | 2.17              | 1.95              | 1.96              | 1.96              |

|                                  |       |       |      |      |      |       |      |        |      |      |       |       |      |      |       |        |      |      |      |      |
|----------------------------------|-------|-------|------|------|------|-------|------|--------|------|------|-------|-------|------|------|-------|--------|------|------|------|------|
| Co-N <sub>3</sub> S              | 27.00 | 9.00  | 7.00 | 1.26 | 2.40 | 58.93 | 1.88 | 63.70  | 7.88 | 3.00 | 21.00 | 13.00 | 3.18 | 6.87 | 11.70 | 221.00 | 2.15 | 1.94 | 2.02 | 2.02 |
| Co-N <sub>2</sub> O <sub>2</sub> | 27.00 | 9.00  | 7.00 | 1.26 | 2.40 | 58.93 | 1.88 | 63.70  | 7.88 | 2.00 | 22.00 | 14.00 | 2.74 | 6.32 | 12.96 | 296.00 | 2.16 | 2.16 | 1.95 | 1.95 |
| Co-N <sub>2</sub> S <sub>2</sub> | 27.00 | 9.00  | 7.00 | 1.26 | 2.40 | 58.93 | 1.88 | 63.70  | 7.88 | 2.00 | 22.00 | 14.00 | 3.52 | 7.10 | 11.24 | 414.00 | 2.17 | 2.17 | 2.04 | 2.04 |
| Co-N <sub>2</sub> OS             | 27.00 | 9.00  | 7.00 | 1.26 | 2.40 | 58.93 | 1.88 | 63.70  | 7.88 | 2.00 | 22.00 | 14.00 | 3.13 | 6.71 | 12.10 | 355.00 | 2.16 | 2.12 | 2.02 | 2.02 |
| Ni-N <sub>4</sub>                | 28.00 | 10.00 | 8.00 | 1.24 | 2.40 | 58.69 | 1.91 | 112.00 | 7.63 | 4.00 | 20.00 | 12.00 | 2.84 | 6.64 | 12.16 | 28.00  | 1.96 | 1.96 | 1.98 | 1.98 |
| Ni-N <sub>3</sub> O              | 28.00 | 10.00 | 8.00 | 1.24 | 2.40 | 58.69 | 1.91 | 112.00 | 7.63 | 3.00 | 21.00 | 13.00 | 2.79 | 6.48 | 12.56 | 162.00 | 2.25 | 1.97 | 1.98 | 1.97 |
| Ni-N <sub>3</sub> S              | 28.00 | 10.00 | 8.00 | 1.24 | 2.40 | 58.69 | 1.91 | 112.00 | 7.63 | 3.00 | 21.00 | 13.00 | 3.18 | 6.87 | 11.70 | 221.00 | 2.12 | 1.94 | 2.05 | 2.05 |
| Ni-N <sub>2</sub> O <sub>2</sub> | 28.00 | 10.00 | 8.00 | 1.24 | 2.40 | 58.69 | 1.91 | 112.00 | 7.63 | 2.00 | 22.00 | 14.00 | 2.74 | 6.32 | 12.96 | 296.00 | 2.17 | 2.16 | 1.95 | 1.95 |
| Ni-N <sub>2</sub> S <sub>2</sub> | 28.00 | 10.00 | 8.00 | 1.24 | 2.40 | 58.69 | 1.91 | 112.00 | 7.63 | 2.00 | 22.00 | 14.00 | 3.52 | 7.10 | 11.24 | 414.00 | 2.14 | 2.14 | 2.03 | 2.03 |
| Ni-N <sub>2</sub> OS             | 28.00 | 10.00 | 8.00 | 1.24 | 2.40 | 58.69 | 1.91 | 112.00 | 7.63 | 2.00 | 22.00 | 14.00 | 3.13 | 6.71 | 12.10 | 355.00 | 2.13 | 2.13 | 2.01 | 2.01 |

---

**Table S11.** The comparison of the training/test RMSE and  $R^2$  scores of three algorithms in fourfold cross-validation for  $U_L^{\text{CO2RR}}$ . The ML model yielding a maximum accuracy is highlighted in bold.

| <b>Algorithm</b> | <b>Loop</b>       | <b>Training RMSE(V)</b> | <b>Training <math>R^2</math></b> | <b>Test RMSE(V)</b> | <b>Test <math>R^2</math></b> |
|------------------|-------------------|-------------------------|----------------------------------|---------------------|------------------------------|
| RFR              | 1                 | 0.09                    | 0.88                             | 0.19                | 0.35                         |
|                  | 2                 | 0.09                    | 0.87                             | 0.24                | 0.35                         |
|                  | 3                 | 0.08                    | 0.92                             | 0.22                | 0.18                         |
|                  | 4                 | 0.09                    | 0.90                             | 0.18                | 0.51                         |
|                  | <i>Mean Value</i> | <i>0.09</i>             | <i>0.89</i>                      | <i>0.20</i>         | <i>0.35</i>                  |
| <b>GBR</b>       | 1                 | 0.06                    | 0.95                             | 0.22                | 0.34                         |
|                  | 2                 | 0.05                    | 0.98                             | 0.09                | 0.61                         |
|                  | 3                 | 0.03                    | 0.98                             | 0.27                | 0.49                         |
|                  | <b>4</b>          | <b>0.05</b>             | <b>0.96</b>                      | <b>0.12</b>         | <b>0.81</b>                  |
|                  | <i>Mean Value</i> | <i>0.05</i>             | <i>0.97</i>                      | <i>0.18</i>         | <i>0.56</i>                  |
| XGBoost          | 1                 | 0.03                    | 0.98                             | 0.23                | 0.43                         |
|                  | 2                 | 0.05                    | 0.97                             | 0.21                | 0.23                         |
|                  | 3                 | 0.04                    | 0.97                             | 0.17                | 0.38                         |
|                  | 4                 | 0.04                    | 0.97                             | 0.13                | 0.71                         |
|                  | <i>Mean Value</i> | <i>0.04</i>             | <i>0.97</i>                      | <i>0.18</i>         | <i>0.43</i>                  |

**Table S12.** The comparison of the training/test RMSE and  $R^2$  scores of three algorithms in fourfold cross-validation for  $\eta^{\text{ORR}}$ . The ML model yielding a maximum accuracy is highlighted in bold.

| Algorithm | Loop              | Training RMSE(V) | Training $R^2$ | Test RMSE(V) | Test $R^2$  |
|-----------|-------------------|------------------|----------------|--------------|-------------|
| RFR       | 1                 | 0.12             | 0.93           | 0.28         | 0.60        |
|           | 2                 | 0.16             | 0.88           | 0.29         | 0.41        |
|           | 3                 | 0.12             | 0.93           | 0.18         | 0.84        |
|           | 4                 | 0.14             | 0.90           | 0.29         | 0.57        |
|           | <i>Mean Value</i> | <i>0.14</i>      | <i>0.91</i>    | <i>0.26</i>  | <i>0.61</i> |
| GBR       | 1                 | 0.02             | 0.99           | 0.24         | 0.55        |
|           | 2                 | 0.02             | 0.99           | 0.23         | 0.70        |
|           | 3                 | 0.03             | 0.99           | 0.21         | 0.85        |
|           | 4                 | 0.01             | 0.99           | 0.33         | 0.50        |
|           | <i>Mean Value</i> | <i>0.02</i>      | <i>0.99</i>    | <i>0.25</i>  | <i>0.65</i> |
| XGBoost   | 1                 | 0.03             | 0.99           | 0.29         | 0.56        |
|           | 2                 | 0.04             | 0.99           | 0.26         | 0.53        |
|           | <b>3</b>          | <b>0.04</b>      | <b>0.99</b>    | <b>0.07</b>  | <b>0.98</b> |
|           | 4                 | 0.04             | 0.99           | 0.15         | 0.92        |
|           | <i>Mean Value</i> | <i>0.04</i>      | <i>0.99</i>    | <i>0.19</i>  | <i>0.74</i> |

**Table S13.** Comparison of the ML-predicted and DFT-calculated  $U_L^{\text{CO2RR}}$  and  $\eta^{\text{ORR}}$  values.

| System                           | $U_L^{\text{CO2RR}}$ |                | $\eta^{\text{ORR}}$ |                |
|----------------------------------|----------------------|----------------|---------------------|----------------|
|                                  | ML-predicted         | DFT-calculated | ML-predicted        | DFT-calculated |
| Fe-N <sub>4</sub>                | -1.25                | -1.26          | 0.66                | 0.65           |
| Fe-N <sub>3</sub> O              | -1.24                | -1.20          | 1.50                | 1.48           |
| Fe-N <sub>3</sub> S              | -1.18                | -1.13          | 1.60                | 1.58           |
| Fe-N <sub>2</sub> O <sub>2</sub> | -0.66                | -0.70          | 1.63                | 1.60           |
| Fe-N <sub>2</sub> S <sub>2</sub> | -0.91                | -0.86          | 1.46                | 1.39           |
| Fe-N <sub>2</sub> OS             | -0.64                | -0.70          | 1.62                | 1.58           |
| Co-N <sub>4</sub>                | -0.89                | -0.89          | 0.43                | 0.44           |
| Co-N <sub>3</sub> O              | -0.67                | -0.83          | 1.76                | 1.64           |
| Co-N <sub>3</sub> S              | -0.74                | -0.78          | 1.32                | 1.30           |
| Co-N <sub>2</sub> O <sub>2</sub> | -0.58                | -0.66          | 1.48                | 1.45           |
| Co-N <sub>2</sub> S <sub>2</sub> | -0.88                | -0.89          | 0.94                | 0.96           |
| Co-N <sub>2</sub> OS             | -0.76                | -0.78          | 1.32                | 1.36           |
| Ni-N <sub>4</sub>                | -1.52                | -1.43          | 0.78                | 0.75           |
| Ni-N <sub>3</sub> O              | -1.35                | -1.18          | 0.74                | 0.72           |
| Ni-N <sub>3</sub> S              | -1.08                | -1.10          | 0.51                | 0.63           |
| Ni-N <sub>2</sub> O <sub>2</sub> | -0.98                | -0.96          | 0.72                | 0.73           |
| Ni-N <sub>2</sub> S <sub>2</sub> | -1.25                | -1.16          | 0.46                | 0.46           |
| Ni-N <sub>2</sub> OS             | -1.05                | -1.09          | 0.63                | 0.63           |



**Table S14.** Feature importance analysis of optimal GBR model for  $U_L^{\text{CO2RR}}$  and XGBoost model for  $\eta^{\text{ORR}}$ .

| $U_L^{\text{CO2RR}}$   |                | $\eta^{\text{ORR}}$    |                |
|------------------------|----------------|------------------------|----------------|
| Feature                | Importance (%) | Feature                | Importance (%) |
| m                      | 33.53          | $d_{\text{M-X1}}$      | 56.01          |
| $d_{\text{M-X2}}$      | 28.26          | $N^{\text{atom}}$      | 27.47          |
| $\sum \text{EA}$       | 12.80          | $n_{\text{N}}$         | 4.51           |
| $d_{\text{M-X1}}$      | 3.54           | m                      | 4.41           |
| $d_{\text{M-N2}}$      | 3.45           | $\sum \text{EA}$       | 3.70           |
| $d_{\text{M-N1}}$      | 2.88           | $\sum r^{\text{atom}}$ | 2.54           |
| $\sum \text{EN}$       | 1.96           | $d_{\text{M-X2}}$      | 0.70           |
| $\sum r^{\text{vdw}}$  | 1.73           | $d_{\text{M-N2}}$      | 0.65           |
| $\sum r^{\text{atom}}$ | 1.69           | $d_{\text{M-N1}}$      | < 0.01         |
| $r^{\text{atom}}$      | 1.61           | $\sum \text{EN}$       | < 0.01         |
| IE                     | 1.50           | $\sum r^{\text{vdw}}$  | < 0.01         |
| EN                     | 1.47           | $r^{\text{atom}}$      | < 0.01         |
| $n_{\text{e}}$         | 1.41           | IE                     | < 0.01         |
| $n_{\text{d}}$         | 1.29           | EN                     | < 0.01         |
| EA                     | 1.25           | $n_{\text{e}}$         | < 0.01         |
| $N^{\text{atom}}$      | 1.22           | $n_{\text{d}}$         | < 0.01         |
| $r^{\text{vdw}}$       | 0.17           | EA                     | < 0.01         |
| $\sum n_{\text{e}}$    | 0.10           | $r^{\text{vdw}}$       | < 0.01         |
| $n_{\text{N}}$         | 0.08           | $\sum n_{\text{e}}$    | < 0.01         |
| $\sum n_{\text{p}}$    | 0.06           | $\sum n_{\text{p}}$    | < 0.01         |
| Total                  | 100            | Total                  | 100            |

**Table S15.** The ML-predicted or DFT-calculated  $U_L^{\text{CO}_2\text{RR}}$  and  $\eta^{\text{ORR}}$  values for Cu-/Pt/Co-embedded Por-COFs.

| System                           | ML-predicted                 |                     | System                           | DFT-calculated               |                     |
|----------------------------------|------------------------------|---------------------|----------------------------------|------------------------------|---------------------|
|                                  | $U_L^{\text{CO}_2\text{RR}}$ | $\eta^{\text{ORR}}$ |                                  | $U_L^{\text{CO}_2\text{RR}}$ | $\eta^{\text{ORR}}$ |
| Cu-N <sub>4</sub>                | -0.88                        | 0.75                |                                  |                              |                     |
| Cu-N <sub>3</sub> O              | -0.85                        | 0.74                |                                  |                              |                     |
| Cu-N <sub>3</sub> S              | -0.81                        | 0.64                | Cu-N <sub>3</sub> S              | -0.67                        | /                   |
| Cu-N <sub>2</sub> O <sub>2</sub> | -0.91                        | 0.74                |                                  |                              |                     |
| Cu-N <sub>2</sub> S <sub>2</sub> | -0.96                        | 0.64                |                                  |                              |                     |
| Cu-N <sub>2</sub> OS             | -0.91                        | 0.65                |                                  |                              |                     |
| Pt-N <sub>4</sub>                | -0.88                        | 0.75                |                                  |                              |                     |
| Pt-N <sub>3</sub> O              | -0.83                        | 0.74                |                                  |                              |                     |
| Pt-N <sub>3</sub> S              | -0.82                        | 0.64                |                                  |                              |                     |
| Pt-N <sub>2</sub> O <sub>2</sub> | -0.82                        | 0.73                |                                  |                              |                     |
| Pt-N <sub>2</sub> S <sub>2</sub> | -0.95                        | 0.64                | Pt-N <sub>2</sub> S <sub>2</sub> | /                            | 0.97                |
| Pt-N <sub>2</sub> OS             | -0.88                        | 0.64                |                                  |                              |                     |
| Co-N <sub>3</sub> C <sub>1</sub> | -1.00                        | /                   | Co-N <sub>3</sub> C <sub>1</sub> | -0.76                        | /                   |
| Co-N <sub>2</sub> C <sub>2</sub> | -0.98                        | /                   | Co-N <sub>2</sub> C <sub>2</sub> | -0.60                        | /                   |

## Reference

- 1 A. Peterson and J. K. Nørskov, Activity Descriptors for CO<sub>2</sub> Electroreduction to Methane on Transition-Metal Catalysts, *J. Phys. Chem. Lett.*, 2012, **3**, 251–258.
- 2 Z. Ni, H. Liang, Z. Yi, R. Guo, C. Liu, Y. Liu, H. Sun and X. Liu, Research progress of electrochemical CO<sub>2</sub> reduction for copper-based catalysts to multicarbon products, *Coord. Chem. Rev.*, 2021, **441**, 213983.
- 3 M. Liu, Z. Zhao, X. Duan and Y. Huang, Nanoscale Structure Design for High-Performance Pt-Based ORR Catalysts, *Adv. Mater.*, 2019, **31**, 1802234.
- 4 K. Kodama, T. Nagai, A. Kuwaki, R. Jinnouchi and Y. Morimoto, Challenges in applying highly active Pt-based nanostructured catalysts for oxygen reduction reactions to fuel cell vehicles, *Nat. Nanotechnol.*, 2021, **16**, 140–147.
- 5 Z. Ren, B. Zhao and J. Xie, Designing N-Confused Metalloporphyrin-Based Covalent Organic Frameworks for Enhanced Electrocatalytic Carbon Dioxide Reduction, *Small*, 2023, **19**, 2301818.
- 6 S. Lin, C. S. Diercks, Y.-B. Zhang, N. Kornienko, E. M. Nichols, Y. Zhao, A. R. Paris, D. Kim, P. Yang, O. M. Yaghi and C. J. Chang, Covalent organic frameworks comprising cobalt porphyrins for catalytic CO<sub>2</sub> reduction in water, *Science*, 2015, **349**, 1208–1213.
- 7 S. An, C. Lu, Q. Xu, C. Lian, C. Peng, J. Hu, X. Zhuang and H. Liu, Constructing Catalytic Crown Ether-Based Covalent Organic Frameworks for Electroreduction of CO<sub>2</sub>, *ACS Energy Lett.*, 2021, **6**, 3496–3502.
- 8 S. Diercks, S. Lin, N. Kornienko, E. A. Kapustin, E. M. Nichols, C. Zhu, Y. Zhao, C. J. Chang and O. M. Yaghi, Reticular Electronic Tuning of Porphyrin Active Sites in Covalent Organic Frameworks for Electrocatalytic Carbon Dioxide Reduction, *J. Am. Chem. Soc.*, 2018, **140**, 1116–1122.
- 9 H.-J. Zhu, M. Lu, Y.-R. Wang, S.-J. Yao, M. Zhang, Y.-H. Kan, J. Liu, Y. Chen, S.-L. Li and Y.-Q. Lan, Efficient electron transmission in covalent organic framework nanosheets for highly active electrocatalytic carbon dioxide reduction, *Nat. Commun.*, 2020, **11**, 497.
- 10 Q. Wu, M.-J. Mao, Q.-J. Wu, J. Liang, Y.-B. Huang and R. Cao, Construction of Donor–Acceptor Heterojunctions in Covalent Organic Framework for Enhanced CO<sub>2</sub> Electroreduction, *Small*, 2021, **17**, 2004933.
- 11 Q. Wu, R.-K. Xie, M.-J. Mao, G.-L. Chai, J.-D. Yi, S.-S. Zhao, Y.-B. Huang and R. Cao, Integration of Strong Electron Transporter Tetrathiafulvalene into Metalloporphyrin-Based Covalent Organic Framework for Highly Efficient Electroreduction of CO<sub>2</sub>, *ACS Energy Lett.*, 2020, **5**, 1005–1012.
- 12 Y. Lu, J. Zhang, W. Wei, D. Ma, X. Wu and Q. Zhu, Efficient Carbon Dioxide Electroreduction over Ultrathin Covalent Organic Framework Nanolayers with Isolated Cobalt Porphyrin Units, *ACS Appl. Mater. Interfaces*, 2020, **12**, 37986–37992.

- 13 M. Fang, L. Xu, H. Zhang, Y. Zhu and W.-Y. Wong, Metalloporphyrin-Linked Mercurated Graphynes for Ultrastable CO<sub>2</sub> Electroreduction to CO with Nearly 100% Selectivity at a Current Density of 1.2 A cm<sup>-2</sup>, *J. Am. Chem. Soc.*, 2022, **144**, 15143–15154.
- 14 T. He, C. Yang, Y. Chen, N. Huang, S. Duan, Z. Zhang, W. Hu and D. Jiang, Bottom-Up Interfacial Design of Covalent Organic Frameworks for Highly Efficient and Selective Electrocatalysis of CO<sub>2</sub>, *Adv. Mater.*, 2022, **34**, 2205186.
- 15 H. Dong, M. Lu, Y. Wang, H.-L. Tang, D. Wu, X. Sun and F.-M. Zhang, Covalently anchoring covalent organic framework on carbon nanotubes for highly efficient electrocatalytic CO<sub>2</sub> reduction, *Appl. Catal. B Environ.*, 2022, **303**, 120897.
